# Supplementary material for: Unusual prism adaptation reveals how grasping is controlled
Source: eLife journal article supplement (doi:10.7554/elife.21440), 2017-09-11
Supplement: supp [file elife-21440-supp-v1.zip]

Archive with 3 entries (3 files):
- elife_poa_e21440_Transparent_Reporting_File.pdf
- elife_poa_e21440_Video_1.mp4
- elife_poa_e21440_Figure_1_Source_Data_File.xlsx
