# Supplementary material for: Unusual prism adaptation reveals how grasping is controlled
Source: eLife journal article supplement (doi:10.7554/elife.21440), 2017-09-11
Supplement: supp [file elife_poa_e21440_Figure_1_Source_Data_File.xlsx]

## Sheet: Data_Fig1
1	1	7	701713	-460679	7.01713	-4.60679
1	1	12	729481	-331817	7.29481	-3.31817
1	1	10	505062	-499325	5.05062	-4.99325
1	1	11	669500	-375040	6.695	-3.7504
1	1	8	781291	-433859	7.81291	-4.33859
1	1	9	915345	-298306	9.15345	-2.98306
1	1	12	608675	-309493	6.08675	-3.09493
1	1	9	958964	-242131	9.58964	-2.42131
1	1	8	765514	-467749	7.65514	-4.67749
1	1	7	596415	-583964	5.96415	-5.83964
1	1	11	582500	-470650	5.825	-4.7065
1	1	10	448238	-543265	4.48238	-5.43265
1	1	7	665732	-503498	6.65732	-5.03498
1	1	8	660699	-451779	6.60699	-4.51779
1	1	12	696172	-260022	6.96172	-2.60022
1	1	10	426380	-508184	4.2638	-5.08184
1	1	11	446185	-539494	4.46185	-5.39494
1	1	9	775090	-374029	7.7509	-3.74029
1	1	8	598955	-412326	5.98955	-4.12326
1	1	11	640390	-291677	6.4039	-2.91677
1	1	7	548981	-484895	5.48981	-4.84895
1	1	12	576888	-245744	5.76888	-2.45744
1	1	9	690968	-392710	6.90968	-3.9271
1	1	10	588051	-297208	5.88051	-2.97208
1	1	9	875773	-257277	8.75773	-2.57277
1	1	10	638559	-355301	6.38559	-3.55301
1	1	12	552516	-306325	5.52516	-3.06325
1	1	11	504978	-379071	5.04978	-3.79071
1	1	8	822677	-335293	8.22677	-3.35293
1	1	7	769545	-296574	7.69545	-2.96574
1	1	1	1010211	NaN	10.1021	NaN
1	1	2	1387368	NaN	13.8737	NaN
1	1	5	NaN	-755194	NaN	-7.55194
1	1	4	NaN	-490759	NaN	-4.90759
1	1	3	1441183	NaN	14.4118	NaN
1	1	6	NaN	-563208	NaN	-5.63208
1	1	1	717521	NaN	7.17521	NaN
1	1	4	NaN	-812167	NaN	-8.12167
1	1	2	1033266	NaN	10.3327	NaN
1	1	6	NaN	-463302	NaN	-4.63302
1	1	3	1174382	NaN	11.7438	NaN
1	1	5	NaN	-1082755	NaN	-10.8276
1	1	6	NaN	-401465	NaN	-4.01465
1	1	3	1251912	NaN	12.5191	NaN
1	1	5	NaN	-419763	NaN	-4.19763
1	1	4	NaN	-446570	NaN	-4.4657
1	1	2	966341	NaN	9.66341	NaN
1	1	1	853202	NaN	8.53202	NaN
1	1	3	1260242	NaN	12.6024	NaN
1	1	5	NaN	-605402	NaN	-6.05402
1	1	4	NaN	-929470	NaN	-9.2947
1	1	6	NaN	-563886	NaN	-5.63886
1	1	1	903048	NaN	9.03048	NaN
1	1	2	860840	NaN	8.6084	NaN
1	1	5	NaN	-635204	NaN	-6.35204
1	1	2	1088438	NaN	10.8844	NaN
1	1	3	1128729	NaN	11.2873	NaN
1	1	6	NaN	-696541	NaN	-6.96541
1	1	4	NaN	-615829	NaN	-6.15829
1	1	1	600011	NaN	6.00011	NaN
1	1	6	NaN	-428414	NaN	-4.28414
1	1	3	1227435	NaN	12.2744	NaN
1	1	5	NaN	-687469	NaN	-6.87469
1	1	4	NaN	-800906	NaN	-8.00906
1	1	1	1004591	NaN	10.0459	NaN
1	1	2	987449	NaN	9.87449	NaN
1	1	1	860724	NaN	8.60724	NaN
1	1	2	1042596	NaN	10.426	NaN
1	1	3	844293	NaN	8.44293	NaN
1	1	5	NaN	-636098	NaN	-6.36098
1	1	4	NaN	-602961	NaN	-6.02961
1	1	6	NaN	-366595	NaN	-3.66595
1	1	5	NaN	-324603	NaN	-3.24603
1	1	1	605135	NaN	6.05135	NaN
1	1	3	969579	NaN	9.69579	NaN
1	1	2	788567	NaN	7.88567	NaN
1	1	6	NaN	-322794	NaN	-3.22794
1	1	4	NaN	-635725	NaN	-6.35725
1	1	5	NaN	-326582	NaN	-3.26582
1	1	4	NaN	-623540	NaN	-6.2354
1	1	3	1190084	NaN	11.9008	NaN
1	1	6	NaN	-407707	NaN	-4.07707
1	1	2	801801	NaN	8.01801	NaN
1	1	1	878627	NaN	8.78627	NaN
1	1	2	798144	NaN	7.98144	NaN
1	1	6	NaN	-365909	NaN	-3.65909
1	1	1	731571	NaN	7.31571	NaN
1	1	3	972997	NaN	9.72997	NaN
1	1	5	NaN	-503386	NaN	-5.03386
1	1	4	NaN	-379350	NaN	-3.7935
1	1	1	957640	NaN	9.5764	NaN
1	1	2	883347	NaN	8.83347	NaN
1	1	4	NaN	-611073	NaN	-6.11073
1	1	3	1072724	NaN	10.7272	NaN
1	1	5	NaN	-467636	NaN	-4.67636
1	1	6	NaN	-257150	NaN	-2.5715
1	1	5	NaN	-582037	NaN	-5.82037
1	1	4	NaN	-597559	NaN	-5.97559
1	1	1	904338	NaN	9.04338	NaN
1	1	3	1026077	NaN	10.2608	NaN
1	1	6	NaN	-455152	NaN	-4.55152
1	1	2	968787	NaN	9.68787	NaN
1	1	1	361135	NaN	3.61135	NaN
1	1	2	948821	NaN	9.48821	NaN
1	1	6	NaN	-416629	NaN	-4.16629
1	1	5	NaN	-526917	NaN	-5.26917
1	1	3	1079989	NaN	10.7999	NaN
1	1	4	NaN	-499002	NaN	-4.99002
1	1	4	NaN	-542332	NaN	-5.42332
1	1	5	NaN	-385035	NaN	-3.85035
1	1	2	1120525	NaN	11.2052	NaN
1	1	3	1086518	NaN	10.8652	NaN
1	1	1	826068	NaN	8.26068	NaN
1	1	6	NaN	-534269	NaN	-5.34269
1	1	6	NaN	-421380	NaN	-4.2138
1	1	3	1106160	NaN	11.0616	NaN
1	1	4	NaN	-552361	NaN	-5.52361
1	1	2	1041491	NaN	10.4149	NaN
1	1	5	NaN	-541378	NaN	-5.41378
1	1	1	736849	NaN	7.36849	NaN
1	1	7	555956	-304642	5.55956	-3.04642
1	1	11	444401	-240166	4.44401	-2.40166
1	1	8	596619	-363787	5.96619	-3.63787
1	1	10	271408	-219306	2.71408	-2.19306
1	1	9	753132	-198132	7.53132	-1.98132
1	1	12	534017	-311886	5.34017	-3.11886
1	1	9	699528	-448638	6.99528	-4.48638
1	1	10	466949	-292303	4.66949	-2.92303
1	1	12	774835	-91185	7.74835	-0.91185
1	1	11	596005	-291000	5.96005	-2.91
1	1	8	852498	-175161	8.52498	-1.75161
1	1	7	598415	-407860	5.98415	-4.0786
1	1	7	657643	-454848	6.57643	-4.54848
1	1	12	618801	-158209	6.18801	-1.58209
1	1	8	573661	-494043	5.73661	-4.94043
1	1	9	933197	-174729	9.33197	-1.74729
1	1	11	440939	-311464	4.40939	-3.11464
1	1	10	411686	-393994	4.11686	-3.93994
1	1	11	433190	-399446	4.3319	-3.99446
1	1	9	781155	-300747	7.81155	-3.00747
1	1	12	668465	-213740	6.68465	-2.1374
1	1	10	618413	-219503	6.18413	-2.19503
1	1	7	588902	-356641	5.88902	-3.56641
1	1	8	711140	-349895	7.1114	-3.49895
1	1	9	590036	-413588	5.90036	-4.13588
1	1	8	653221	-417642	6.53221	-4.17642
1	1	12	374076	-384577	3.74076	-3.84577
1	1	7	586671	-334255	5.86671	-3.34255
1	1	11	321549	-324805	3.21549	-3.24805
1	1	10	447872	-317826	4.47872	-3.17826
1	2	10	112125	-700627	1.12125	-7.00627
1	2	8	593945	-492009	5.93945	-4.92009
1	2	11	-50366	-678024	-0.50366	-6.78024
1	2	7	481936	-469627	4.81936	-4.69627
1	2	9	730752	-457568	7.30752	-4.57568
1	2	12	383308	-477486	3.83308	-4.77486
1	2	8	716806	-485233	7.16806	-4.85233
1	2	12	524281	-415710	5.24281	-4.1571
1	2	9	735268	-382255	7.35268	-3.82255
1	2	7	789194	-350567	7.89194	-3.50567
1	2	10	636076	-373950	6.36076	-3.7395
1	2	11	562395	-433679	5.62395	-4.33679
1	2	9	1015675	-148688	10.1568	-1.48688
1	2	12	697515	-330585	6.97515	-3.30585
1	2	7	732839	-422307	7.32839	-4.22307
1	2	11	359479	-532632	3.59479	-5.32632
1	2	8	679798	-381928	6.79798	-3.81928
1	2	10	304792	-466689	3.04792	-4.66689
1	2	8	852742	-321453	8.52742	-3.21453
1	2	12	532481	-305183	5.32481	-3.05183
1	2	10	477435	-463382	4.77435	-4.63382
1	2	9	798199	-415439	7.98199	-4.15439
1	2	11	451612	-362541	4.51612	-3.62541
1	2	7	532913	-568185	5.32913	-5.68185
1	2	12	613736	-307609	6.13736	-3.07609
1	2	9	664770	-450644	6.6477	-4.50644
1	2	11	461231	-444790	4.61231	-4.4479
1	2	10	294378	-565215	2.94378	-5.65215
1	2	7	717521	-405503	7.17521	-4.05503
1	2	8	742365	-392356	7.42365	-3.92356
1	2	3	160521	NaN	1.60521	NaN
1	2	1	482799	NaN	4.82799	NaN
1	2	5	NaN	359145	NaN	3.59145
1	2	2	992716	NaN	9.92716	NaN
1	2	4	NaN	50224	NaN	0.50224
1	2	6	NaN	-129451	NaN	-1.29451
1	2	6	NaN	-292060	NaN	-2.9206
1	2	3	688812	NaN	6.88812	NaN
1	2	2	881499	NaN	8.81499	NaN
1	2	4	NaN	-151031	NaN	-1.51031
1	2	1	1016498	NaN	10.165	NaN
1	2	5	NaN	-505972	NaN	-5.05972
1	2	2	1360277	NaN	13.6028	NaN
1	2	6	NaN	-331840	NaN	-3.3184
1	2	4	NaN	-927047	NaN	-9.27047
1	2	5	NaN	-520723	NaN	-5.20723
1	2	3	1593385	NaN	15.9338	NaN
1	2	1	822764	NaN	8.22764	NaN
1	2	4	NaN	-296444	NaN	-2.96444
1	2	1	1190080	NaN	11.9008	NaN
1	2	2	1600958	NaN	16.0096	NaN
1	2	3	1671483	NaN	16.7148	NaN
1	2	6	NaN	-168868	NaN	-1.68868
1	2	5	NaN	-311015	NaN	-3.11015
1	2	2	1301562	NaN	13.0156	NaN
1	2	6	NaN	-421112	NaN	-4.21112
1	2	5	NaN	-417390	NaN	-4.1739
1	2	3	1405055	NaN	14.0505	NaN
1	2	1	1087222	NaN	10.8722	NaN
1	2	4	NaN	-630101	NaN	-6.30101
1	2	6	NaN	-367317	NaN	-3.67317
1	2	1	788553	NaN	7.88553	NaN
1	2	3	1124623	NaN	11.2462	NaN
1	2	4	NaN	-556806	NaN	-5.56806
1	2	2	937470	NaN	9.3747	NaN
1	2	5	NaN	-376177	NaN	-3.76177
1	2	5	NaN	-437470	NaN	-4.3747
1	2	6	NaN	-228018	NaN	-2.28018
1	2	4	NaN	-707109	NaN	-7.07109
1	2	1	789910	NaN	7.8991	NaN
1	2	3	1138191	NaN	11.3819	NaN
1	2	2	1000491	NaN	10.0049	NaN
1	2	4	NaN	-482076	NaN	-4.82076
1	2	6	NaN	-176642	NaN	-1.76642
1	2	3	1437758	NaN	14.3776	NaN
1	2	2	1177474	NaN	11.7747	NaN
1	2	1	734201	NaN	7.34201	NaN
1	2	5	NaN	-432540	NaN	-4.3254
1	2	4	NaN	-591191	NaN	-5.91191
1	2	1	738827	NaN	7.38827	NaN
1	2	5	NaN	-343183	NaN	-3.43183
1	2	6	NaN	-416523	NaN	-4.16523
1	2	3	1211211	NaN	12.1121	NaN
1	2	2	1129555	NaN	11.2956	NaN
1	2	5	NaN	-452387	NaN	-4.52387
1	2	1	843253	NaN	8.43253	NaN
1	2	6	NaN	-562616	NaN	-5.62616
1	2	2	1393467	NaN	13.9347	NaN
1	2	3	1134225	NaN	11.3422	NaN
1	2	4	NaN	-686404	NaN	-6.86404
1	2	1	1076313	NaN	10.7631	NaN
1	2	6	NaN	-292875	NaN	-2.92875
1	2	2	1222201	NaN	12.222	NaN
1	2	5	NaN	-804409	NaN	-8.04409
1	2	3	1311095	NaN	13.111	NaN
1	2	4	NaN	-940824	NaN	-9.40824
1	2	4	NaN	-441701	NaN	-4.41701
1	2	3	1170021	NaN	11.7002	NaN
1	2	6	NaN	-402142	NaN	-4.02142
1	2	2	1051552	NaN	10.5155	NaN
1	2	5	NaN	-698296	NaN	-6.98296
1	2	1	743474	NaN	7.43474	NaN
1	2	2	971436	NaN	9.71436	NaN
1	2	4	NaN	-502920	NaN	-5.0292
1	2	6	NaN	-449501	NaN	-4.49501
1	2	5	NaN	-837915	NaN	-8.37915
1	2	1	545496	NaN	5.45496	NaN
1	2	3	1096397	NaN	10.964	NaN
1	2	4	NaN	-868133	NaN	-8.68133
1	2	1	963845	NaN	9.63845	NaN
1	2	2	1123029	NaN	11.2303	NaN
1	2	6	NaN	-397648	NaN	-3.97648
1	2	5	NaN	-618673	NaN	-6.18673
1	2	3	1429805	NaN	14.298	NaN
1	2	4	NaN	-798632	NaN	-7.98632
1	2	3	1292456	NaN	12.9246	NaN
1	2	5	NaN	-684644	NaN	-6.84644
1	2	2	1065180	NaN	10.6518	NaN
1	2	6	NaN	-326672	NaN	-3.26672
1	2	1	823253	NaN	8.23253	NaN
1	2	7	949297	-352379	9.49297	-3.52379
1	2	12	616832	-380349	6.16832	-3.80349
1	2	8	1012726	-285238	10.1273	-2.85238
1	2	11	483617	-298413	4.83617	-2.98413
1	2	9	814241	-312886	8.14241	-3.12886
1	2	10	465982	-484340	4.65982	-4.8434
1	2	12	494390	-134950	4.9439	-1.3495
1	2	8	767960	-410774	7.6796	-4.10774
1	2	9	936433	-383615	9.36433	-3.83615
1	2	11	532962	-325534	5.32962	-3.25534
1	2	10	557510	-445807	5.5751	-4.45807
1	2	7	871018	-298335	8.71018	-2.98335
1	2	12	662795	-317780	6.62795	-3.1778
1	2	10	331126	-514473	3.31126	-5.14473
1	2	8	915625	-367539	9.15625	-3.67539
1	2	9	945579	-270070	9.45579	-2.7007
1	2	7	640255	-579992	6.40255	-5.79992
1	2	11	508584	-347430	5.08584	-3.4743
1	2	10	667828	-352464	6.67828	-3.52464
1	2	8	824672	-364368	8.24672	-3.64368
1	2	11	755958	-159400	7.55958	-1.594
1	2	9	784828	-369565	7.84828	-3.69565
1	2	12	764002	-170660	7.64002	-1.7066
1	2	7	721520	-380311	7.2152	-3.80311
1	2	7	780352	-435837	7.80352	-4.35837
1	2	12	546908	-324946	5.46908	-3.24946
1	2	8	824996	-332707	8.24996	-3.32707
1	2	11	585913	-403661	5.85913	-4.03661
1	2	9	618951	-399093	6.18951	-3.99093
1	2	10	565765	-429590	5.65765	-4.2959
2	1	10	611768	-311785	6.11768	-3.11785
2	1	9	515171	-527827	5.15171	-5.27827
2	1	8	756208	-341867	7.56208	-3.41867
2	1	7	632504	-493139	6.32504	-4.93139
2	1	12	468584	-461020	4.68584	-4.6102
2	1	11	499246	-352385	4.99246	-3.52385
2	1	9	892005	-248632	8.92005	-2.48632
2	1	8	607234	-483612	6.07234	-4.83612
2	1	7	648660	-419368	6.4866	-4.19368
2	1	11	540405	-363388	5.40405	-3.63388
2	1	10	615306	-312265	6.15306	-3.12265
2	1	12	477036	-391499	4.77036	-3.91499
2	1	11	602155	-302822	6.02155	-3.02822
2	1	7	698391	-324602	6.98391	-3.24602
2	1	10	573130	-231476	5.7313	-2.31476
2	1	8	518242	-436060	5.18242	-4.3606
2	1	12	287066	-590467	2.87066	-5.90467
2	1	9	748334	-334060	7.48334	-3.3406
2	1	11	540378	-383689	5.40378	-3.83689
2	1	7	787943	-326231	7.87943	-3.26231
2	1	9	702148	-439343	7.02148	-4.39343
2	1	8	655592	-451873	6.55592	-4.51873
2	1	12	420265	-417723	4.20265	-4.17723
2	1	10	488827	-393648	4.88827	-3.93648
2	1	10	424804	-416034	4.24804	-4.16034
2	1	9	373462	-663982	3.73462	-6.63982
2	1	8	786446	-323459	7.86446	-3.23459
2	1	7	691534	-381998	6.91534	-3.81998
2	1	11	486441	-410075	4.86441	-4.10075
2	1	12	464970	-456045	4.6497	-4.56045
2	1	6	NaN	-782079	NaN	-7.82079
2	1	5	NaN	-636743	NaN	-6.36743
2	1	3	1247530	NaN	12.4753	NaN
2	1	4	NaN	-576275	NaN	-5.76275
2	1	2	1160822	NaN	11.6082	NaN
2	1	1	917897	NaN	9.17897	NaN
2	1	2	882909	NaN	8.82909	NaN
2	1	1	824157	NaN	8.24157	NaN
2	1	4	NaN	-245888	NaN	-2.45888
2	1	5	NaN	-271533	NaN	-2.71533
2	1	6	NaN	-178205	NaN	-1.78205
2	1	3	963525	NaN	9.63525	NaN
2	1	2	798745	NaN	7.98745	NaN
2	1	5	NaN	-327556	NaN	-3.27556
2	1	6	NaN	-337323	NaN	-3.37323
2	1	4	NaN	-553052	NaN	-5.53052
2	1	3	1054083	NaN	10.5408	NaN
2	1	1	742940	NaN	7.4294	NaN
2	1	4	NaN	-336777	NaN	-3.36777
2	1	6	NaN	-271910	NaN	-2.7191
2	1	3	925230	NaN	9.2523	NaN
2	1	5	NaN	-342301	NaN	-3.42301
2	1	1	838615	NaN	8.38615	NaN
2	1	2	798937	NaN	7.98937	NaN
2	1	4	NaN	-1005949	NaN	-10.0595
2	1	1	535597	NaN	5.35597	NaN
2	1	6	NaN	-266684	NaN	-2.66684
2	1	5	NaN	-190710	NaN	-1.9071
2	1	2	822729	NaN	8.22729	NaN
2	1	3	920396	NaN	9.20396	NaN
2	1	2	632560	NaN	6.3256	NaN
2	1	1	479853	NaN	4.79853	NaN
2	1	5	NaN	-404254	NaN	-4.04254
2	1	6	NaN	-330760	NaN	-3.3076
2	1	4	NaN	-505297	NaN	-5.05297
2	1	3	983614	NaN	9.83614	NaN
2	1	5	NaN	-302278	NaN	-3.02278
2	1	2	995917	NaN	9.95917	NaN
2	1	3	1090882	NaN	10.9088	NaN
2	1	6	NaN	-281230	NaN	-2.8123
2	1	4	NaN	-397945	NaN	-3.97945
2	1	1	740854	NaN	7.40854	NaN
2	1	6	NaN	-207407	NaN	-2.07407
2	1	4	NaN	-451480	NaN	-4.5148
2	1	5	NaN	-270076	NaN	-2.70076
2	1	1	897637	NaN	8.97637	NaN
2	1	2	623309	NaN	6.23309	NaN
2	1	3	807963	NaN	8.07963	NaN
2	1	3	638869	NaN	6.38869	NaN
2	1	6	NaN	-306654	NaN	-3.06654
2	1	1	587262	NaN	5.87262	NaN
2	1	5	NaN	-366683	NaN	-3.66683
2	1	4	NaN	-438779	NaN	-4.38779
2	1	2	721452	NaN	7.21452	NaN
2	1	4	NaN	-264252	NaN	-2.64252
2	1	3	889511	NaN	8.89511	NaN
2	1	1	671058	NaN	6.71058	NaN
2	1	2	962627	NaN	9.62627	NaN
2	1	5	NaN	-367909	NaN	-3.67909
2	1	6	NaN	-210445	NaN	-2.10445
2	1	5	NaN	-169854	NaN	-1.69854
2	1	6	NaN	-362908	NaN	-3.62908
2	1	2	681847	NaN	6.81847	NaN
2	1	3	781119	NaN	7.81119	NaN
2	1	4	NaN	-580626	NaN	-5.80626
2	1	1	638329	NaN	6.38329	NaN
2	1	2	746669	NaN	7.46669	NaN
2	1	4	NaN	-500793	NaN	-5.00793
2	1	3	684930	NaN	6.8493	NaN
2	1	6	NaN	-0.5994	NaN	NaN
2	1	5	NaN	-262420	NaN	-2.6242
2	1	1	568036	NaN	5.68036	NaN
2	1	4	NaN	-418929	NaN	-4.18929
2	1	6	NaN	-161824	NaN	-1.61824
2	1	3	827905	NaN	8.27905	NaN
2	1	5	NaN	-279106	NaN	-2.79106
2	1	1	682375	NaN	6.82375	NaN
2	1	2	677389	NaN	6.77389	NaN
2	1	5	NaN	-240618	NaN	-2.40618
2	1	4	NaN	-458757	NaN	-4.58757
2	1	1	588326	NaN	5.88326	NaN
2	1	2	801906	NaN	8.01906	NaN
2	1	6	NaN	-236864	NaN	-2.36864
2	1	3	876683	NaN	8.76683	NaN
2	1	6	NaN	-355268	NaN	-3.55268
2	1	2	759831	NaN	7.59831	NaN
2	1	4	NaN	-318717	NaN	-3.18717
2	1	1	812900	NaN	8.129	NaN
2	1	5	NaN	-340096	NaN	-3.40096
2	1	3	968756	NaN	9.68756	NaN
2	1	12	729932	-109278	7.29932	-1.09278
2	1	8	830735	-254537	8.30735	-2.54537
2	1	10	641929	-212131	6.41929	-2.12131
2	1	7	788090	-310976	7.8809	-3.10976
2	1	11	595457	-310707	5.95457	-3.10707
2	1	9	794568	-315142	7.94568	-3.15142
2	1	12	648780	-278808	6.4878	-2.78808
2	1	9	777066	-344453	7.77066	-3.44453
2	1	11	656375	-221222	6.56375	-2.21222
2	1	10	525424	-300918	5.25424	-3.00918
2	1	7	811653	-272430	8.11653	-2.7243
2	1	8	730501	-348607	7.30501	-3.48607
2	1	11	626068	-209483	6.26068	-2.09483
2	1	10	528435	-317601	5.28435	-3.17601
2	1	8	662184	-361562	6.62184	-3.61562
2	1	12	721471	-212649	7.21471	-2.12649
2	1	9	732342	-369067	7.32342	-3.69067
2	1	7	804760	-280882	8.0476	-2.80882
2	1	10	455498	-363432	4.55498	-3.63432
2	1	8	859516	-274819	8.59516	-2.74819
2	1	9	810860	-325439	8.1086	-3.25439
2	1	12	607821	-204370	6.07821	-2.0437
2	1	7	700439	-388927	7.00439	-3.88927
2	1	11	538453	-267768	5.38453	-2.67768
2	1	10	592295	-258496	5.92295	-2.58496
2	1	7	665920	-453383	6.6592	-4.53383
2	1	12	513363	-341011	5.13363	-3.41011
2	1	11	559705	-278200	5.59705	-2.782
2	1	9	961865	-189965	9.61865	-1.89965
2	1	8	784039	-367183	7.84039	-3.67183
2	2	7	464857	-618853	4.64857	-6.18853
2	2	12	466100	-398282	4.661	-3.98282
2	2	10	623178	-205343	6.23178	-2.05343
2	2	9	783993	-312770	7.83993	-3.1277
2	2	8	657714	-429812	6.57714	-4.29812
2	2	11	484002	-458170	4.84002	-4.5817
2	2	7	637509	-458291	6.37509	-4.58291
2	2	11	605353	-340164	6.05353	-3.40164
2	2	12	635310	-299803	6.3531	-2.99803
2	2	8	668807	-436328	6.68807	-4.36328
2	2	9	738732	-354380	7.38732	-3.5438
2	2	10	630935	-383399	6.30935	-3.83399
2	2	12	582890	-300482	5.8289	-3.00482
2	2	11	489658	-363311	4.89658	-3.63311
2	2	7	655439	-340850	6.55439	-3.4085
2	2	8	595991	-365105	5.95991	-3.65105
2	2	10	569221	-284367	5.69221	-2.84367
2	2	9	669120	-387117	6.6912	-3.87117
2	2	9	680260	-385356	6.8026	-3.85356
2	2	10	455058	-390625	4.55058	-3.90625
2	2	8	514408	-409550	5.14408	-4.0955
2	2	7	526118	-380925	5.26118	-3.80925
2	2	12	414628	-369402	4.14628	-3.69402
2	2	11	483792	-325700	4.83792	-3.257
2	2	7	573263	-417758	5.73263	-4.17758
2	2	9	472471	-555865	4.72471	-5.55865
2	2	10	501954	-382563	5.01954	-3.82563
2	2	12	485315	-340838	4.85315	-3.40838
2	2	8	698226	-360748	6.98226	-3.60748
2	2	11	499474	-363247	4.99474	-3.63247
2	2	4	NaN	111639	NaN	1.11639
2	2	2	640186	NaN	6.40186	NaN
2	2	5	NaN	84629	NaN	0.84629
2	2	6	NaN	-213881	NaN	-2.13881
2	2	1	584531	NaN	5.84531	NaN
2	2	3	1145081	NaN	11.4508	NaN
2	2	2	929844	NaN	9.29844	NaN
2	2	1	726061	NaN	7.26061	NaN
2	2	4	NaN	158188	NaN	1.58188
2	2	6	NaN	65995	NaN	0.65995
2	2	3	542228	NaN	5.42228	NaN
2	2	5	NaN	-405940	NaN	-4.0594
2	2	4	NaN	-430417	NaN	-4.30417
2	2	5	NaN	-241144	NaN	-2.41144
2	2	2	624970	NaN	6.2497	NaN
2	2	1	517571	NaN	5.17571	NaN
2	2	3	725873	NaN	7.25873	NaN
2	2	6	NaN	-36767	NaN	-0.36767
2	2	4	NaN	-440611	NaN	-4.40611
2	2	3	815494	NaN	8.15494	NaN
2	2	2	716024	NaN	7.16024	NaN
2	2	5	NaN	-328955	NaN	-3.28955
2	2	1	477409	NaN	4.77409	NaN
2	2	6	NaN	-163955	NaN	-1.63955
2	2	5	NaN	-371567	NaN	-3.71567
2	2	6	NaN	-438591	NaN	-4.38591
2	2	4	NaN	-456812	NaN	-4.56812
2	2	1	379618	NaN	3.79618	NaN
2	2	2	672625	NaN	6.72625	NaN
2	2	3	778322	NaN	7.78322	NaN
2	2	2	746734	NaN	7.46734	NaN
2	2	3	625435	NaN	6.25435	NaN
2	2	6	NaN	-343662	NaN	-3.43662
2	2	1	535806	NaN	5.35806	NaN
2	2	4	NaN	-369136	NaN	-3.69136
2	2	5	NaN	-378027	NaN	-3.78027
2	2	3	528033	NaN	5.28033	NaN
2	2	4	NaN	-298662	NaN	-2.98662
2	2	1	659057	NaN	6.59057	NaN
2	2	2	735835	NaN	7.35835	NaN
2	2	6	NaN	-351863	NaN	-3.51863
2	2	5	NaN	-532069	NaN	-5.32069
2	2	4	NaN	-611937	NaN	-6.11937
2	2	3	541141	NaN	5.41141	NaN
2	2	6	NaN	-189838	NaN	-1.89838
2	2	5	NaN	-372869	NaN	-3.72869
2	2	2	498196	NaN	4.98196	NaN
2	2	1	625588	NaN	6.25588	NaN
2	2	5	NaN	-375394	NaN	-3.75394
2	2	1	353982	NaN	3.53982	NaN
2	2	3	886934	NaN	8.86934	NaN
2	2	4	NaN	-412420	NaN	-4.1242
2	2	2	609587	NaN	6.09587	NaN
2	2	6	NaN	-340789	NaN	-3.40789
2	2	1	555772	NaN	5.55772	NaN
2	2	3	826431	NaN	8.26431	NaN
2	2	5	NaN	-262590	NaN	-2.6259
2	2	2	890244	NaN	8.90244	NaN
2	2	6	NaN	-201447	NaN	-2.01447
2	2	4	NaN	-563622	NaN	-5.63622
2	2	4	NaN	-468373	NaN	-4.68373
2	2	5	NaN	-278164	NaN	-2.78164
2	2	2	593209	NaN	5.93209	NaN
2	2	6	NaN	-390756	NaN	-3.90756
2	2	3	560435	NaN	5.60435	NaN
2	2	1	421808	NaN	4.21808	NaN
2	2	2	864666	NaN	8.64666	NaN
2	2	6	NaN	-306661	NaN	-3.06661
2	2	5	NaN	-370502	NaN	-3.70502
2	2	3	847220	NaN	8.4722	NaN
2	2	4	NaN	-408533	NaN	-4.08533
2	2	1	675246	NaN	6.75246	NaN
2	2	1	543442	NaN	5.43442	NaN
2	2	6	NaN	-177869	NaN	-1.77869
2	2	2	814943	NaN	8.14943	NaN
2	2	4	NaN	-411938	NaN	-4.11938
2	2	3	786853	NaN	7.86853	NaN
2	2	5	NaN	-297122	NaN	-2.97122
2	2	1	400890	NaN	4.0089	NaN
2	2	4	NaN	-666849	NaN	-6.66849
2	2	5	NaN	-378656	NaN	-3.78656
2	2	6	NaN	-308284	NaN	-3.08284
2	2	2	581951	NaN	5.81951	NaN
2	2	3	516141	NaN	5.16141	NaN
2	2	4	NaN	-506804	NaN	-5.06804
2	2	3	711929	NaN	7.11929	NaN
2	2	5	NaN	-247943	NaN	-2.47943
2	2	2	446943	NaN	4.46943	NaN
2	2	6	NaN	-225061	NaN	-2.25061
2	2	1	430798	NaN	4.30798	NaN
2	2	10	768722	-236301	7.68722	-2.36301
2	2	9	754893	-381966	7.54893	-3.81966
2	2	11	638083	-328585	6.38083	-3.28585
2	2	8	802534	-275128	8.02534	-2.75128
2	2	12	710041	-256212	7.10041	-2.56212
2	2	7	918712	-160882	9.18712	-1.60882
2	2	12	668937	-296518	6.68937	-2.96518
2	2	11	602915	-343312	6.02915	-3.43312
2	2	9	787359	-405873	7.87359	-4.05873
2	2	8	816057	-390978	8.16057	-3.90978
2	2	7	720900	-451388	7.209	-4.51388
2	2	10	557147	-375399	5.57147	-3.75399
2	2	8	756808	-420122	7.56808	-4.20122
2	2	12	727198	-221441	7.27198	-2.21441
2	2	7	NaN	-361562	NaN	-3.61562
2	2	11	606325	-361425	6.06325	-3.61425
2	2	9	790685	-346085	7.90685	-3.46085
2	2	10	705286	-179552	7.05286	-1.79552
2	2	10	556949	-404431	5.56949	-4.04431
2	2	7	704588	-371665	7.04588	-3.71665
2	2	12	655386	-365508	6.55386	-3.65508
2	2	8	650559	-468906	6.50559	-4.68906
2	2	9	701140	-472117	7.0114	-4.72117
2	2	11	711946	-271289	7.11946	-2.71289
2	2	10	745901	-205608	7.45901	-2.05608
2	2	12	708444	-313087	7.08444	-3.13087
2	2	9	679494	-514589	6.79494	-5.14589
2	2	11	466544	-540420	4.66544	-5.4042
2	2	8	712582	-354482	7.12582	-3.54482
2	2	7	610326	-512574	6.10326	-5.12574
3	1	9	616924	-247112	6.16924	-2.47112
3	1	12	430765	-401293	4.30765	-4.01293
3	1	7	NaN	-205343	NaN	-2.05343
3	1	11	625108	-270633	6.25108	-2.70633
3	1	10	565952	-215842	5.65952	-2.15842
3	1	8	632741	-381336	6.32741	-3.81336
3	1	7	870876	-268277	8.70876	-2.68277
3	1	12	517066	-278802	5.17066	-2.78802
3	1	10	622052	-349039	6.22052	-3.49039
3	1	8	728042	-400072	7.28042	-4.00072
3	1	11	470446	-258024	4.70446	-2.58024
3	1	9	739869	-255755	7.39869	-2.55755
3	1	10	495703	-261439	4.95703	-2.61439
3	1	11	698731	-59724	6.98731	-0.59724
3	1	8	594772	-439545	5.94772	-4.39545
3	1	12	678763	-173408	6.78763	-1.73408
3	1	7	601836	-440742	6.01836	-4.40742
3	1	9	661842	-366355	6.61842	-3.66355
3	1	7	619178	-361962	6.19178	-3.61962
3	1	12	665059	-123032	6.65059	-1.23032
3	1	8	658070	-458300	6.5807	-4.583
3	1	9	NaN	-380925	NaN	-3.80925
3	1	10	701052	-161183	7.01052	-1.61183
3	1	11	520631	-359748	5.20631	-3.59748
3	1	10	327622	-369784	3.27622	-3.69784
3	1	8	651232	-401787	6.51232	-4.01787
3	1	11	678934	-108278	6.78934	-1.08278
3	1	7	634586	-374480	6.34586	-3.7448
3	1	12	502947	-223794	5.02947	-2.23794
3	1	9	NaN	-363247	NaN	-3.63247
3	1	1	1346455	NaN	13.4645	NaN
3	1	6	NaN	563471	NaN	5.63471
3	1	4	NaN	-1439737	NaN	-14.3974
3	1	2	1487360	NaN	14.8736	NaN
3	1	3	1109747	NaN	11.0975	NaN
3	1	5	NaN	-154277	NaN	-1.54277
3	1	3	1185840	NaN	11.8584	NaN
3	1	6	NaN	-728022	NaN	-7.28022
3	1	1	951777	NaN	9.51777	NaN
3	1	5	NaN	-83977	NaN	-0.83977
3	1	4	NaN	-719687	NaN	-7.19687
3	1	2	747183	NaN	7.47183	NaN
3	1	1	905299	NaN	9.05299	NaN
3	1	4	NaN	-538162	NaN	-5.38162
3	1	2	894520	NaN	8.9452	NaN
3	1	3	981087	NaN	9.81087	NaN
3	1	5	NaN	-432748	NaN	-4.32748
3	1	6	NaN	-633065	NaN	-6.33065
3	1	3	1048341	NaN	10.4834	NaN
3	1	2	1097360	NaN	10.9736	NaN
3	1	6	NaN	-492373	NaN	-4.92373
3	1	5	NaN	-418756	NaN	-4.18756
3	1	4	NaN	-1020252	NaN	-10.2025
3	1	1	942404	NaN	9.42404	NaN
3	1	3	1339451	NaN	13.3945	NaN
3	1	2	689943	NaN	6.89943	NaN
3	1	5	NaN	-708758	NaN	-7.08758
3	1	4	NaN	-903528	NaN	-9.03528
3	1	1	1166449	NaN	11.6645	NaN
3	1	6	NaN	-430056	NaN	-4.30056
3	1	3	1129237	NaN	11.2924	NaN
3	1	6	NaN	-290652	NaN	-2.90652
3	1	4	NaN	-580078	NaN	-5.80078
3	1	5	NaN	-628761	NaN	-6.28761
3	1	1	723722	NaN	7.23722	NaN
3	1	2	716272	NaN	7.16272	NaN
3	1	1	901469	NaN	9.01469	NaN
3	1	2	1229619	NaN	12.2962	NaN
3	1	3	986432	NaN	9.86432	NaN
3	1	5	NaN	-776717	NaN	-7.76717
3	1	4	NaN	-1008111	NaN	-10.0811
3	1	6	NaN	-528827	NaN	-5.28827
3	1	3	1075196	NaN	10.752	NaN
3	1	6	NaN	-384104	NaN	-3.84104
3	1	4	NaN	-592007	NaN	-5.92007
3	1	5	NaN	-545481	NaN	-5.45481
3	1	1	884792	NaN	8.84792	NaN
3	1	2	695677	NaN	6.95677	NaN
3	1	2	571624	NaN	5.71624	NaN
3	1	4	NaN	-1154314	NaN	-11.5431
3	1	3	1056707	NaN	10.5671	NaN
3	1	5	NaN	-222739	NaN	-2.22739
3	1	1	380935	NaN	3.80935	NaN
3	1	6	NaN	-313183	NaN	-3.13183
3	1	5	NaN	-583819	NaN	-5.83819
3	1	1	576630	NaN	5.7663	NaN
3	1	3	951147	NaN	9.51147	NaN
3	1	2	447068	NaN	4.47068	NaN
3	1	4	NaN	-447424	NaN	-4.47424
3	1	6	NaN	-424869	NaN	-4.24869
3	1	3	894624	NaN	8.94624	NaN
3	1	2	692678	NaN	6.92678	NaN
3	1	5	NaN	-458479	NaN	-4.58479
3	1	6	NaN	-405737	NaN	-4.05737
3	1	1	651060	NaN	6.5106	NaN
3	1	4	NaN	-241244	NaN	-2.41244
3	1	1	1134597	NaN	11.346	NaN
3	1	3	1243178	NaN	12.4318	NaN
3	1	4	NaN	-991029	NaN	-9.91029
3	1	2	1210950	NaN	12.1095	NaN
3	1	6	NaN	-335117	NaN	-3.35117
3	1	5	NaN	-418924	NaN	-4.18924
3	1	6	NaN	-350692	NaN	-3.50692
3	1	1	729528	NaN	7.29528	NaN
3	1	4	NaN	-321358	NaN	-3.21358
3	1	3	924052	NaN	9.24052	NaN
3	1	5	NaN	-675010	NaN	-6.7501
3	1	2	602824	NaN	6.02824	NaN
3	1	2	727719	NaN	7.27719	NaN
3	1	6	NaN	-498679	NaN	-4.98679
3	1	5	NaN	-525378	NaN	-5.25378
3	1	4	NaN	-629847	NaN	-6.29847
3	1	1	272000	NaN	2.72	NaN
3	1	3	1021245	NaN	10.2125	NaN
3	1	6	NaN	-280003	NaN	-2.80003
3	1	2	720049	NaN	7.20049	NaN
3	1	4	NaN	-631344	NaN	-6.31344
3	1	1	410872	NaN	4.10872	NaN
3	1	5	NaN	-148527	NaN	-1.48527
3	1	3	1105172	NaN	11.0517	NaN
3	1	12	686058	12458	6.86058	0.12458
3	1	8	672380	-160064	6.7238	-1.60064
3	1	10	554492	-173919	5.54492	-1.73919
3	1	7	679819	-157037	6.79819	-1.57037
3	1	11	584525	-114888	5.84525	-1.14888
3	1	9	550072	-322985	5.50072	-3.22985
3	1	12	427483	-150728	4.27483	-1.50728
3	1	10	634065	-122289	6.34065	-1.22289
3	1	7	719495	-222064	7.19495	-2.22064
3	1	8	574271	-288762	5.74271	-2.88762
3	1	9	NaN	-451388	NaN	-4.51388
3	1	11	402562	-258543	4.02562	-2.58543
3	1	11	417942	-291783	4.17942	-2.91783
3	1	8	719714	-194044	7.19714	-1.94044
3	1	12	505141	-218198	5.05141	-2.18198
3	1	7	667524	-301016	6.67524	-3.01016
3	1	10	544902	-290263	5.44902	-2.90263
3	1	9	NaN	-179552	NaN	-1.79552
3	1	8	468880	-488381	4.6888	-4.88381
3	1	9	550683	-268512	5.50683	-2.68512
3	1	11	553889	-196655	5.53889	-1.96655
3	1	7	566657	-394283	5.66657	-3.94283
3	1	12	483936	-243904	4.83936	-2.43904
3	1	10	715081	-36684	7.15081	-0.36684
3	1	7	456762	-440337	4.56762	-4.40337
3	1	10	466540	-324743	4.6654	-3.24743
3	1	9	683229	-308043	6.83229	-3.08043
3	1	8	536075	-396683	5.36075	-3.96683
3	1	11	505326	-331340	5.05326	-3.3134
3	1	12	618013	-161010	6.18013	-1.6101
3	2	9	731214	-391227	7.31214	-3.91227
3	2	8	516623	-557858	5.16623	-5.57858
3	2	10	486354	-331167	4.86354	-3.31167
3	2	7	579551	-548675	5.79551	-5.48675
3	2	12	543031	-263336	5.43031	-2.63336
3	2	11	397208	-401360	3.97208	-4.0136
3	2	11	256479	-540020	2.56479	-5.4002
3	2	9	727349	-277923	7.27349	-2.77923
3	2	8	631369	-432200	6.31369	-4.322
3	2	7	575800	-522684	5.758	-5.22684
3	2	10	529578	-302791	5.29578	-3.02791
3	2	12	528268	-296902	5.28268	-2.96902
3	2	11	606392	-217705	6.06392	-2.17705
3	2	8	624643	-466437	6.24643	-4.66437
3	2	12	414508	-414230	4.14508	-4.1423
3	2	9	685731	-410048	6.85731	-4.10048
3	2	10	578841	-328438	5.78841	-3.28438
3	2	7	560637	-590796	5.60637	-5.90796
3	2	10	591684	-299587	5.91684	-2.99587
3	2	7	746785	-395493	7.46785	-3.95493
3	2	11	559831	-279935	5.59831	-2.79935
3	2	12	545576	-294637	5.45576	-2.94637
3	2	8	802472	-236511	8.02472	-2.36511
3	2	9	510494	-496430	5.10494	-4.9643
3	2	10	472118	-343396	4.72118	-3.43396
3	2	7	546929	-519498	5.46929	-5.19498
3	2	11	563526	-273984	5.63526	-2.73984
3	2	9	754092	-283570	7.54092	-2.8357
3	2	8	485143	-556330	4.85143	-5.5633
3	2	12	308088	-512204	3.08088	-5.12204
3	2	3	931011	NaN	9.31011	NaN
3	2	1	710527	NaN	7.10527	NaN
3	2	4	NaN	596947	NaN	5.96947
3	2	2	551921	NaN	5.51921	NaN
3	2	5	NaN	-0.0334	NaN	NaN
3	2	6	NaN	-21024	NaN	-0.21024
3	2	6	NaN	-71870	NaN	-0.7187
3	2	1	642551	NaN	6.42551	NaN
3	2	5	NaN	-257591	NaN	-2.57591
3	2	2	361714	NaN	3.61714	NaN
3	2	4	NaN	-292020	NaN	-2.9202
3	2	3	649164	NaN	6.49164	NaN
3	2	5	NaN	-43351	NaN	-0.43351
3	2	6	NaN	-154247	NaN	-1.54247
3	2	1	362924	NaN	3.62924	NaN
3	2	4	NaN	-75318	NaN	-0.75318
3	2	2	304954	NaN	3.04954	NaN
3	2	3	368072	NaN	3.68072	NaN
3	2	3	421548	NaN	4.21548	NaN
3	2	1	372462	NaN	3.72462	NaN
3	2	2	552510	NaN	5.5251	NaN
3	2	4	NaN	-198165	NaN	-1.98165
3	2	6	NaN	-76238	NaN	-0.76238
3	2	5	NaN	-204821	NaN	-2.04821
3	2	6	NaN	-215930	NaN	-2.1593
3	2	3	560444	NaN	5.60444	NaN
3	2	5	NaN	-338350	NaN	-3.3835
3	2	1	425182	NaN	4.25182	NaN
3	2	2	837051	NaN	8.37051	NaN
3	2	4	NaN	-219318	NaN	-2.19318
3	2	4	NaN	-293380	NaN	-2.9338
3	2	5	NaN	-191704	NaN	-1.91704
3	2	6	NaN	-331196	NaN	-3.31196
3	2	2	211418	NaN	2.11418	NaN
3	2	1	605485	NaN	6.05485	NaN
3	2	3	749832	NaN	7.49832	NaN
3	2	2	469209	NaN	4.69209	NaN
3	2	1	540730	NaN	5.4073	NaN
3	2	3	700678	NaN	7.00678	NaN
3	2	4	NaN	-86724	NaN	-0.86724
3	2	5	NaN	-247788	NaN	-2.47788
3	2	6	NaN	-167666	NaN	-1.67666
3	2	2	428597	NaN	4.28597	NaN
3	2	1	665369	NaN	6.65369	NaN
3	2	5	NaN	-378224	NaN	-3.78224
3	2	6	NaN	-149977	NaN	-1.49977
3	2	4	NaN	-291090	NaN	-2.9109
3	2	3	719942	NaN	7.19942	NaN
3	2	3	645072	NaN	6.45072	NaN
3	2	1	472816	NaN	4.72816	NaN
3	2	6	NaN	-55875	NaN	-0.55875
3	2	4	NaN	-375167	NaN	-3.75167
3	2	2	759060	NaN	7.5906	NaN
3	2	5	NaN	-327094	NaN	-3.27094
3	2	1	446727	NaN	4.46727	NaN
3	2	2	579593	NaN	5.79593	NaN
3	2	5	NaN	-322354	NaN	-3.22354
3	2	3	601659	NaN	6.01659	NaN
3	2	6	NaN	-78087	NaN	-0.78087
3	2	4	NaN	-252502	NaN	-2.52502
3	2	2	387357	NaN	3.87357	NaN
3	2	3	655749	NaN	6.55749	NaN
3	2	4	NaN	-431686	NaN	-4.31686
3	2	6	NaN	-45765	NaN	-0.45765
3	2	5	NaN	-298796	NaN	-2.98796
3	2	1	481762	NaN	4.81762	NaN
3	2	6	NaN	-225365	NaN	-2.25365
3	2	2	465356	NaN	4.65356	NaN
3	2	1	682131	NaN	6.82131	NaN
3	2	4	NaN	-258278	NaN	-2.58278
3	2	5	NaN	-482902	NaN	-4.82902
3	2	3	253165	NaN	2.53165	NaN
3	2	6	NaN	-509117	NaN	-5.09117
3	2	2	418577	NaN	4.18577	NaN
3	2	5	NaN	-543276	NaN	-5.43276
3	2	4	NaN	-294119	NaN	-2.94119
3	2	3	707504	NaN	7.07504	NaN
3	2	1	564665	NaN	5.64665	NaN
3	2	4	NaN	-462275	NaN	-4.62275
3	2	5	NaN	-559216	NaN	-5.59216
3	2	2	260561	NaN	2.60561	NaN
3	2	3	484339	NaN	4.84339	NaN
3	2	1	523692	NaN	5.23692	NaN
3	2	6	NaN	-286776	NaN	-2.86776
3	2	6	NaN	-434877	NaN	-4.34877
3	2	1	609288	NaN	6.09288	NaN
3	2	5	NaN	-435712	NaN	-4.35712
3	2	2	359425	NaN	3.59425	NaN
3	2	4	NaN	-559452	NaN	-5.59452
3	2	3	609725	NaN	6.09725	NaN
3	2	12	575922	-341541	5.75922	-3.41541
3	2	7	584457	-539760	5.84457	-5.3976
3	2	11	449832	-492187	4.49832	-4.92187
3	2	8	375211	-699669	3.75211	-6.99669
3	2	10	430849	-481644	4.30849	-4.81644
3	2	9	498880	-611387	4.9888	-6.11387
3	2	9	760220	-357892	7.6022	-3.57892
3	2	10	345734	-474396	3.45734	-4.74396
3	2	12	392895	-492857	3.92895	-4.92857
3	2	11	408764	-461983	4.08764	-4.61983
3	2	8	499907	-603180	4.99907	-6.0318
3	2	7	681438	-499247	6.81438	-4.99247
3	2	10	501551	-453352	5.01551	-4.53352
3	2	12	533625	-357256	5.33625	-3.57256
3	2	7	614679	-484838	6.14679	-4.84838
3	2	8	518192	-579085	5.18192	-5.79085
3	2	11	416292	-444994	4.16292	-4.44994
3	2	9	535269	-516449	5.35269	-5.16449
3	2	12	375829	-457453	3.75829	-4.57453
3	2	8	435261	-705068	4.35261	-7.05068
3	2	7	617998	-490622	6.17998	-4.90622
3	2	10	705206	-161548	7.05206	-1.61548
3	2	11	470131	-413437	4.70131	-4.13437
3	2	9	659492	-349714	6.59492	-3.49714
3	2	10	585963	-341659	5.85963	-3.41659
3	2	8	748510	-331339	7.4851	-3.31339
3	2	9	497185	-593588	4.97185	-5.93588
3	2	7	525813	-609334	5.25813	-6.09334
3	2	12	485839	-455824	4.85839	-4.55824
3	2	11	537021	-345884	5.37021	-3.45884
4	1	11	409118	-550634	4.09118	-5.50634
4	1	9	732454	-467610	7.32454	-4.6761
4	1	8	465385	-539146	4.65385	-5.39146
4	1	12	814450	-114309	8.1445	-1.14309
4	1	7	885107	-542119	8.85107	-5.42119
4	1	10	419853	-670110	4.19853	-6.7011
4	1	8	702423	-700623	7.02423	-7.00623
4	1	12	831842	-279527	8.31842	-2.79527
4	1	7	843054	-532963	8.43054	-5.32963
4	1	11	546684	-632857	5.46684	-6.32857
4	1	9	945478	-440839	9.45478	-4.40839
4	1	10	355481	-780755	3.55481	-7.80755
4	1	7	1000535	-337220	10.0053	-3.3722
4	1	12	785100	-410568	7.851	-4.10568
4	1	8	606397	-735474	6.06397	-7.35474
4	1	10	524458	-630709	5.24458	-6.30709
4	1	11	643035	-449698	6.43035	-4.49698
4	1	9	704922	-619527	7.04922	-6.19527
4	1	11	721701	-359173	7.21701	-3.59173
4	1	8	720845	-636851	7.20845	-6.36851
4	1	9	801530	-488446	8.0153	-4.88446
4	1	7	813609	-558469	8.13609	-5.58469
4	1	10	505743	-653608	5.05743	-6.53608
4	1	12	811361	-296227	8.11361	-2.96227
4	1	7	728111	-571465	7.28111	-5.71465
4	1	11	647251	-328696	6.47251	-3.28696
4	1	10	694074	-321181	6.94074	-3.21181
4	1	12	589514	-303536	5.89514	-3.03536
4	1	9	841290	-530613	8.4129	-5.30613
4	1	8	679062	-575571	6.79062	-5.75571
4	1	6	NaN	-1078221	NaN	-10.7822
4	1	3	1434422	NaN	14.3442	NaN
4	1	2	1152033	NaN	11.5203	NaN
4	1	5	NaN	-890651	NaN	-8.90651
4	1	1	1091391	NaN	10.9139	NaN
4	1	4	NaN	-906078	NaN	-9.06078
4	1	3	1104765	NaN	11.0477	NaN
4	1	4	NaN	-943457	NaN	-9.43457
4	1	1	1019330	NaN	10.1933	NaN
4	1	6	NaN	-707361	NaN	-7.07361
4	1	2	966018	NaN	9.66018	NaN
4	1	5	NaN	-677030	NaN	-6.7703
4	1	2	991961	NaN	9.91961	NaN
4	1	4	NaN	-687153	NaN	-6.87153
4	1	1	1113585	NaN	11.1358	NaN
4	1	5	NaN	-748127	NaN	-7.48127
4	1	6	NaN	-544736	NaN	-5.44736
4	1	3	1060883	NaN	10.6088	NaN
4	1	2	1014106	NaN	10.1411	NaN
4	1	1	882007	NaN	8.82007	NaN
4	1	5	NaN	-673471	NaN	-6.73471
4	1	6	NaN	-623099	NaN	-6.23099
4	1	4	NaN	-791530	NaN	-7.9153
4	1	3	1166301	NaN	11.663	NaN
4	1	4	NaN	-742625	NaN	-7.42625
4	1	1	929765	NaN	9.29765	NaN
4	1	3	956500	NaN	9.565	NaN
4	1	2	877509	NaN	8.77509	NaN
4	1	6	NaN	-693398	NaN	-6.93398
4	1	5	NaN	-670404	NaN	-6.70404
4	1	4	NaN	-616175	NaN	-6.16175
4	1	6	NaN	-492255	NaN	-4.92255
4	1	2	755195	NaN	7.55195	NaN
4	1	3	858340	NaN	8.5834	NaN
4	1	1	704494	NaN	7.04494	NaN
4	1	5	NaN	-826078	NaN	-8.26078
4	1	4	NaN	-848887	NaN	-8.48887
4	1	2	782839	NaN	7.82839	NaN
4	1	5	NaN	-745288	NaN	-7.45288
4	1	1	960204	NaN	9.60204	NaN
4	1	3	1139092	NaN	11.3909	NaN
4	1	6	NaN	-495786	NaN	-4.95786
4	1	6	NaN	-532782	NaN	-5.32782
4	1	3	797479	NaN	7.97479	NaN
4	1	2	794608	NaN	7.94608	NaN
4	1	1	775180	NaN	7.7518	NaN
4	1	4	NaN	-656854	NaN	-6.56854
4	1	5	NaN	-590516	NaN	-5.90516
4	1	4	NaN	-606860	NaN	-6.0686
4	1	1	1219283	NaN	12.1928	NaN
4	1	2	938214	NaN	9.38214	NaN
4	1	5	NaN	-696533	NaN	-6.96533
4	1	6	NaN	-396067	NaN	-3.96067
4	1	3	686043	NaN	6.86043	NaN
4	1	1	752734	NaN	7.52734	NaN
4	1	5	NaN	-692981	NaN	-6.92981
4	1	2	663398	NaN	6.63398	NaN
4	1	3	718791	NaN	7.18791	NaN
4	1	4	NaN	-959847	NaN	-9.59847
4	1	6	NaN	-394965	NaN	-3.94965
4	1	2	795132	NaN	7.95132	NaN
4	1	1	661656	NaN	6.61656	NaN
4	1	6	NaN	-548999	NaN	-5.48999
4	1	4	NaN	-934529	NaN	-9.34529
4	1	5	NaN	-498449	NaN	-4.98449
4	1	3	863060	NaN	8.6306	NaN
4	1	1	958130	NaN	9.5813	NaN
4	1	4	NaN	-798091	NaN	-7.98091
4	1	5	NaN	-931490	NaN	-9.3149
4	1	2	1024396	NaN	10.244	NaN
4	1	3	911323	NaN	9.11323	NaN
4	1	6	NaN	-520155	NaN	-5.20155
4	1	5	NaN	-682476	NaN	-6.82476
4	1	6	NaN	-639517	NaN	-6.39517
4	1	2	807941	NaN	8.07941	NaN
4	1	4	NaN	-572471	NaN	-5.72471
4	1	1	905243	NaN	9.05243	NaN
4	1	3	798250	NaN	7.9825	NaN
4	1	4	NaN	-706223	NaN	-7.06223
4	1	2	704606	NaN	7.04606	NaN
4	1	6	NaN	-558076	NaN	-5.58076
4	1	3	802854	NaN	8.02854	NaN
4	1	5	NaN	-660221	NaN	-6.60221
4	1	1	558325	NaN	5.58325	NaN
4	1	5	NaN	-652085	NaN	-6.52085
4	1	3	871111	NaN	8.71111	NaN
4	1	4	NaN	-822864	NaN	-8.22864
4	1	2	712075	NaN	7.12075	NaN
4	1	6	NaN	-851256	NaN	-8.51256
4	1	1	1148840	NaN	11.4884	NaN
4	1	7	633450	-375795	6.3345	-3.75795
4	1	12	477955	-159891	4.77955	-1.59891
4	1	8	497063	-329402	4.97063	-3.29402
4	1	10	381993	-443140	3.81993	-4.4314
4	1	9	676356	-382303	6.76356	-3.82303
4	1	11	499987	-212803	4.99987	-2.12803
4	1	10	476953	-274362	4.76953	-2.74362
4	1	8	549728	-524633	5.49728	-5.24633
4	1	12	318595	-161611	3.18595	-1.61611
4	1	9	558555	-438101	5.58555	-4.38101
4	1	11	271108	-553702	2.71108	-5.53702
4	1	7	311775	-561043	3.11775	-5.61043
4	1	12	359478	-306536	3.59478	-3.06536
4	1	10	599496	-263760	5.99496	-2.6376
4	1	7	417062	-472918	4.17062	-4.72918
4	1	11	314245	-248828	3.14245	-2.48828
4	1	9	809968	-405415	8.09968	-4.05415
4	1	8	551264	-400806	5.51264	-4.00806
4	1	9	704725	-468354	7.04725	-4.68354
4	1	12	630645	-283282	6.30645	-2.83282
4	1	11	435576	-490706	4.35576	-4.90706
4	1	8	418473	-682681	4.18473	-6.82681
4	1	7	602093	-652202	6.02093	-6.52202
4	1	10	501426	-362155	5.01426	-3.62155
4	1	12	367899	-391130	3.67899	-3.9113
4	1	8	708216	-360543	7.08216	-3.60543
4	1	7	555880	-540461	5.5588	-5.40461
4	1	9	615769	-565453	6.15769	-5.65453
4	1	10	295774	-427240	2.95774	-4.2724
4	1	11	393344	-456687	3.93344	-4.56687
4	2	10	763076	-363086	7.63076	-3.63086
4	2	11	759156	-456384	7.59156	-4.56384
4	2	9	893934	-542085	8.93934	-5.42085
4	2	7	809790	-498382	8.0979	-4.98382
4	2	12	575396	-344697	5.75396	-3.44697
4	2	8	822362	-402290	8.22362	-4.0229
4	2	7	732615	-547467	7.32615	-5.47467
4	2	10	524141	-607193	5.24141	-6.07193
4	2	8	853798	-533576	8.53798	-5.33576
4	2	12	354463	-693195	3.54463	-6.93195
4	2	11	669692	-370162	6.69692	-3.70162
4	2	9	856894	-465635	8.56894	-4.65635
4	2	10	451854	-486736	4.51854	-4.86736
4	2	12	472744	-604563	4.72744	-6.04563
4	2	7	620747	-563715	6.20747	-5.63715
4	2	9	694744	-652764	6.94744	-6.52764
4	2	8	740842	-570180	7.40842	-5.7018
4	2	11	526307	-542100	5.26307	-5.421
4	2	8	676492	-689105	6.76492	-6.89105
4	2	12	440269	-582729	4.40269	-5.82729
4	2	10	497584	-596537	4.97584	-5.96537
4	2	11	539348	-502394	5.39348	-5.02394
4	2	9	570140	-666771	5.7014	-6.66771
4	2	7	385255	-763008	3.85255	-7.63008
4	2	10	495649	-527285	4.95649	-5.27285
4	2	8	718695	-508140	7.18695	-5.0814
4	2	9	544461	-655845	5.44461	-6.55845
4	2	11	403498	-523826	4.03498	-5.23826
4	2	12	471928	-460833	4.71928	-4.60833
4	2	7	527785	-622458	5.27785	-6.22458
4	2	2	1129383	NaN	11.2938	NaN
4	2	1	502439	NaN	5.02439	NaN
4	2	4	NaN	-343441	NaN	-3.43441
4	2	3	643364	NaN	6.43364	NaN
4	2	5	NaN	-370483	NaN	-3.70483
4	2	6	NaN	-265241	NaN	-2.65241
4	2	2	624109	NaN	6.24109	NaN
4	2	3	815512	NaN	8.15512	NaN
4	2	6	NaN	-417346	NaN	-4.17346
4	2	4	NaN	-381515	NaN	-3.81515
4	2	5	NaN	-289377	NaN	-2.89377
4	2	1	595132	NaN	5.95132	NaN
4	2	1	433019	NaN	4.33019	NaN
4	2	3	1095630	NaN	10.9563	NaN
4	2	4	NaN	729544	NaN	7.29544
4	2	5	NaN	-430553	NaN	-4.30553
4	2	2	880724	NaN	8.80724	NaN
4	2	6	NaN	-219929	NaN	-2.19929
4	2	6	NaN	-539591	NaN	-5.39591
4	2	5	NaN	-367630	NaN	-3.6763
4	2	4	NaN	-561880	NaN	-5.6188
4	2	2	585817	NaN	5.85817	NaN
4	2	3	776181	NaN	7.76181	NaN
4	2	1	857228	NaN	8.57228	NaN
4	2	1	791255	NaN	7.91255	NaN
4	2	5	NaN	-244761	NaN	-2.44761
4	2	3	809667	NaN	8.09667	NaN
4	2	6	NaN	-331962	NaN	-3.31962
4	2	2	483139	NaN	4.83139	NaN
4	2	4	NaN	-470346	NaN	-4.70346
4	2	6	NaN	-311358	NaN	-3.11358
4	2	1	747636	NaN	7.47636	NaN
4	2	3	1025228	NaN	10.2523	NaN
4	2	2	962286	NaN	9.62286	NaN
4	2	4	NaN	-466159	NaN	-4.66159
4	2	5	NaN	-213860	NaN	-2.1386
4	2	2	910520	NaN	9.1052	NaN
4	2	6	NaN	-556845	NaN	-5.56845
4	2	4	NaN	-302452	NaN	-3.02452
4	2	5	NaN	-167379	NaN	-1.67379
4	2	3	1112131	NaN	11.1213	NaN
4	2	1	629371	NaN	6.29371	NaN
4	2	2	794748	NaN	7.94748	NaN
4	2	6	NaN	-374807	NaN	-3.74807
4	2	1	540048	NaN	5.40048	NaN
4	2	4	NaN	-436502	NaN	-4.36502
4	2	5	NaN	-384353	NaN	-3.84353
4	2	3	961922	NaN	9.61922	NaN
4	2	2	700265	NaN	7.00265	NaN
4	2	4	NaN	-522381	NaN	-5.22381
4	2	3	945379	NaN	9.45379	NaN
4	2	5	NaN	-368626	NaN	-3.68626
4	2	6	NaN	-244458	NaN	-2.44458
4	2	1	569915	NaN	5.69915	NaN
4	2	1	672791	NaN	6.72791	NaN
4	2	4	NaN	-444998	NaN	-4.44998
4	2	6	NaN	-189036	NaN	-1.89036
4	2	5	NaN	-447612	NaN	-4.47612
4	2	3	777850	NaN	7.7785	NaN
4	2	2	816992	NaN	8.16992	NaN
4	2	6	NaN	-64466	NaN	-0.64466
4	2	1	798586	NaN	7.98586	NaN
4	2	5	NaN	-459005	NaN	-4.59005
4	2	4	NaN	-351803	NaN	-3.51803
4	2	3	780863	NaN	7.80863	NaN
4	2	2	973468	NaN	9.73468	NaN
4	2	5	NaN	-456212	NaN	-4.56212
4	2	4	NaN	-442023	NaN	-4.42023
4	2	1	726625	NaN	7.26625	NaN
4	2	2	922632	NaN	9.22632	NaN
4	2	6	NaN	-218667	NaN	-2.18667
4	2	3	768934	NaN	7.68934	NaN
4	2	6	NaN	-498352	NaN	-4.98352
4	2	5	NaN	-644797	NaN	-6.44797
4	2	1	647798	NaN	6.47798	NaN
4	2	3	867718	NaN	8.67718	NaN
4	2	4	NaN	-453158	NaN	-4.53158
4	2	2	754347	NaN	7.54347	NaN
4	2	4	NaN	-311395	NaN	-3.11395
4	2	2	685886	NaN	6.85886	NaN
4	2	1	807047	NaN	8.07047	NaN
4	2	3	1018882	NaN	10.1888	NaN
4	2	6	NaN	-191777	NaN	-1.91777
4	2	5	NaN	-416161	NaN	-4.16161
4	2	5	NaN	-352885	NaN	-3.52885
4	2	1	654214	NaN	6.54214	NaN
4	2	6	NaN	-286317	NaN	-2.86317
4	2	3	798143	NaN	7.98143	NaN
4	2	4	NaN	-328620	NaN	-3.2862
4	2	2	942154	NaN	9.42154	NaN
4	2	8	1008645	-217923	10.0864	-2.17923
4	2	10	584489	-391179	5.84489	-3.91179
4	2	9	673398	-572701	6.73398	-5.72701
4	2	12	536401	-448598	5.36401	-4.48598
4	2	7	768572	-545041	7.68572	-5.45041
4	2	11	368654	-567526	3.68654	-5.67526
4	2	8	551473	-654792	5.51473	-6.54792
4	2	9	657513	-646309	6.57513	-6.46309
4	2	12	623186	-392989	6.23186	-3.92989
4	2	10	574385	-503931	5.74385	-5.03931
4	2	11	491624	-443071	4.91624	-4.43071
4	2	7	709801	-630855	7.09801	-6.30855
4	2	11	316300	-696680	3.163	-6.9668
4	2	7	680817	-623159	6.80817	-6.23159
4	2	12	674517	-403546	6.74517	-4.03546
4	2	10	726548	-405776	7.26548	-4.05776
4	2	8	703418	-622206	7.03418	-6.22206
4	2	9	703082	-499251	7.03082	-4.99251
4	2	12	652168	-310152	6.52168	-3.10152
4	2	9	747466	-554383	7.47466	-5.54383
4	2	11	504313	-587516	5.04313	-5.87516
4	2	10	679591	-402346	6.79591	-4.02346
4	2	7	592815	-714081	5.92815	-7.14081
4	2	8	758047	-558610	7.58047	-5.5861
4	2	11	642891	-413499	6.42891	-4.13499
4	2	12	509554	-534537	5.09554	-5.34537
4	2	7	745615	-654268	7.45615	-6.54268
4	2	8	733462	-619857	7.33462	-6.19857
4	2	10	560563	-536074	5.60563	-5.36074
4	2	9	787594	-454142	7.87594	-4.54142
5	1	9	498990	-667397	4.9899	-6.67397
5	1	10	262134	-605370	2.62134	-6.0537
5	1	11	374953	-383544	3.74953	-3.83544
5	1	12	474535	-408825	4.74535	-4.08825
5	1	7	399944	-584744	3.99944	-5.84744
5	1	8	572560	-340444	5.7256	-3.40444
5	1	9	710679	-499332	7.10679	-4.99332
5	1	12	537271	-315291	5.37271	-3.15291
5	1	7	470759	-491862	4.70759	-4.91862
5	1	10	554563	-203780	5.54563	-2.0378
5	1	8	804904	-174903	8.04904	-1.74903
5	1	11	412153	-411274	4.12153	-4.11274
5	1	9	597438	-485016	5.97438	-4.85016
5	1	10	623019	-196890	6.23019	-1.9689
5	1	12	588720	-358298	5.8872	-3.58298
5	1	8	702181	-396349	7.02181	-3.96349
5	1	11	595173	-232821	5.95173	-2.32821
5	1	7	695053	-410874	6.95053	-4.10874
5	1	11	697043	-264709	6.97043	-2.64709
5	1	12	541169	-357000	5.41169	-3.57
5	1	9	650896	-413019	6.50896	-4.13019
5	1	10	507281	-270240	5.07281	-2.7024
5	1	8	637461	-275788	6.37461	-2.75788
5	1	7	637410	-362174	6.3741	-3.62174
5	1	10	718944	-77301	7.18944	-0.77301
5	1	8	763876	-266811	7.63876	-2.66811
5	1	9	691307	-317966	6.91307	-3.17966
5	1	11	485763	-374596	4.85763	-3.74596
5	1	7	600569	-459704	6.00569	-4.59704
5	1	12	608295	-278665	6.08295	-2.78665
5	1	2	1360644	NaN	13.6064	NaN
5	1	1	680069	NaN	6.80069	NaN
5	1	4	NaN	-907513	NaN	-9.07513
5	1	3	1111113	NaN	11.1111	NaN
5	1	6	NaN	-738572	NaN	-7.38572
5	1	5	NaN	-653349	NaN	-6.53349
5	1	4	NaN	-718621	NaN	-7.18621
5	1	3	817654	NaN	8.17654	NaN
5	1	2	771950	NaN	7.7195	NaN
5	1	1	715384	NaN	7.15384	NaN
5	1	6	NaN	-535156	NaN	-5.35156
5	1	5	NaN	-755486	NaN	-7.55486
5	1	3	1009931	NaN	10.0993	NaN
5	1	1	856253	NaN	8.56253	NaN
5	1	2	795305	NaN	7.95305	NaN
5	1	6	NaN	-538853	NaN	-5.38853
5	1	4	NaN	-249096	NaN	-2.49096
5	1	5	NaN	-403893	NaN	-4.03893
5	1	3	898663	NaN	8.98663	NaN
5	1	4	NaN	-799761	NaN	-7.99761
5	1	1	516433	NaN	5.16433	NaN
5	1	5	NaN	-226589	NaN	-2.26589
5	1	6	NaN	-0.6372	NaN	NaN
5	1	2	685722	NaN	6.85722	NaN
5	1	1	882019	NaN	8.82019	NaN
5	1	2	855107	NaN	8.55107	NaN
5	1	5	NaN	-834478	NaN	-8.34478
5	1	4	NaN	-590630	NaN	-5.9063
5	1	3	1336653	NaN	13.3665	NaN
5	1	6	NaN	-90042	NaN	-0.90042
5	1	5	NaN	-548329	NaN	-5.48329
5	1	4	NaN	-487055	NaN	-4.87055
5	1	1	569689	NaN	5.69689	NaN
5	1	3	856672	NaN	8.56672	NaN
5	1	2	378382	NaN	3.78382	NaN
5	1	6	NaN	-112741	NaN	-1.12741
5	1	4	NaN	-568769	NaN	-5.68769
5	1	6	NaN	-136185	NaN	-1.36185
5	1	2	712176	NaN	7.12176	NaN
5	1	1	425253	NaN	4.25253	NaN
5	1	3	797411	NaN	7.97411	NaN
5	1	5	NaN	-655888	NaN	-6.55888
5	1	2	713266	NaN	7.13266	NaN
5	1	5	NaN	-441195	NaN	-4.41195
5	1	3	885044	NaN	8.85044	NaN
5	1	4	NaN	-694764	NaN	-6.94764
5	1	1	703799	NaN	7.03799	NaN
5	1	6	NaN	-425909	NaN	-4.25909
5	1	4	NaN	-536936	NaN	-5.36936
5	1	6	NaN	-268467	NaN	-2.68467
5	1	2	960997	NaN	9.60997	NaN
5	1	1	471639	NaN	4.71639	NaN
5	1	3	899267	NaN	8.99267	NaN
5	1	5	NaN	-283953	NaN	-2.83953
5	1	6	NaN	79318	NaN	0.79318
5	1	4	NaN	-250689	NaN	-2.50689
5	1	1	289738	NaN	2.89738	NaN
5	1	5	NaN	-300109	NaN	-3.00109
5	1	3	860198	NaN	8.60198	NaN
5	1	2	833146	NaN	8.33146	NaN
5	1	3	834377	NaN	8.34377	NaN
5	1	2	661826	NaN	6.61826	NaN
5	1	5	NaN	-694997	NaN	-6.94997
5	1	6	NaN	-210874	NaN	-2.10874
5	1	1	764915	NaN	7.64915	NaN
5	1	4	NaN	-683703	NaN	-6.83703
5	1	5	NaN	-498289	NaN	-4.98289
5	1	2	765005	NaN	7.65005	NaN
5	1	3	907807	NaN	9.07807	NaN
5	1	6	NaN	-551690	NaN	-5.5169
5	1	1	636358	NaN	6.36358	NaN
5	1	4	NaN	-495856	NaN	-4.95856
5	1	3	843802	NaN	8.43802	NaN
5	1	4	NaN	-734419	NaN	-7.34419
5	1	5	NaN	-386383	NaN	-3.86383
5	1	6	NaN	-455377	NaN	-4.55377
5	1	1	444471	NaN	4.44471	NaN
5	1	2	785262	NaN	7.85262	NaN
5	1	2	683638	NaN	6.83638	NaN
5	1	5	NaN	-533309	NaN	-5.33309
5	1	1	741340	NaN	7.4134	NaN
5	1	4	NaN	-629623	NaN	-6.29623
5	1	6	NaN	-260244	NaN	-2.60244
5	1	3	930718	NaN	9.30718	NaN
5	1	3	859204	NaN	8.59204	NaN
5	1	4	NaN	-563928	NaN	-5.63928
5	1	1	665458	NaN	6.65458	NaN
5	1	5	NaN	-407004	NaN	-4.07004
5	1	2	717669	NaN	7.17669	NaN
5	1	6	NaN	-242957	NaN	-2.42957
5	1	12	765216	256923	7.65216	2.56923
5	1	8	549139	-309725	5.49139	-3.09725
5	1	11	469365	-127226	4.69365	-1.27226
5	1	7	676176	-247258	6.76176	-2.47258
5	1	10	486151	-325502	4.86151	-3.25502
5	1	9	750876	-357910	7.50876	-3.5791
5	1	12	682069	-173496	6.82069	-1.73496
5	1	9	573124	-444640	5.73124	-4.4464
5	1	7	645686	-391454	6.45686	-3.91454
5	1	10	598521	-167989	5.98521	-1.67989
5	1	8	832508	-243248	8.32508	-2.43248
5	1	11	682213	-48398	6.82213	-0.48398
5	1	11	667585	-95103	6.67585	-0.95103
5	1	10	510323	-313058	5.10323	-3.13058
5	1	9	706410	-302437	7.0641	-3.02437
5	1	8	672497	-352156	6.72497	-3.52156
5	1	7	688911	-367088	6.88911	-3.67088
5	1	12	711211	-114279	7.11211	-1.14279
5	1	7	808176	-239663	8.08176	-2.39663
5	1	10	327497	-493014	3.27497	-4.93014
5	1	9	697359	-311572	6.97359	-3.11572
5	1	12	520592	-282110	5.20592	-2.8211
5	1	11	741682	-185503	7.41682	-1.85503
5	1	8	651162	-283941	6.51162	-2.83941
5	1	7	702162	-271827	7.02162	-2.71827
5	1	10	671331	-166633	6.71331	-1.66633
5	1	9	674890	-432281	6.7489	-4.32281
5	1	8	754658	-242187	7.54658	-2.42187
5	1	11	410927	-396640	4.10927	-3.9664
5	1	12	744605	-134534	7.44605	-1.34534
5	2	10	485787	-421424	4.85787	-4.21424
5	2	11	652554	-178741	6.52554	-1.78741
5	2	7	628940	-411891	6.2894	-4.11891
5	2	9	603531	-480705	6.03531	-4.80705
5	2	12	359543	-376721	3.59543	-3.76721
5	2	8	656990	-400457	6.5699	-4.00457
5	2	12	450649	-341180	4.50649	-3.4118
5	2	8	456939	-496505	4.56939	-4.96505
5	2	11	415073	-287207	4.15073	-2.87207
5	2	9	596798	-390571	5.96798	-3.90571
5	2	10	222434	-479006	2.22434	-4.79006
5	2	7	602855	-456279	6.02855	-4.56279
5	2	10	249631	-322717	2.49631	-3.22717
5	2	9	428730	-367175	4.2873	-3.67175
5	2	7	240769	-582151	2.40769	-5.82151
5	2	8	-536837	-1178401	-5.36837	-11.784
5	2	12	591598	-159910	5.91598	-1.5991
5	2	11	555751	-239528	5.55751	-2.39528
5	2	7	543847	-484329	5.43847	-4.84329
5	2	9	597451	-395340	5.97451	-3.9534
5	2	8	811777	-154255	8.11777	-1.54255
5	2	12	721217	-105707	7.21217	-1.05707
5	2	10	636398	-93273	6.36398	-0.93273
5	2	11	573835	-92274	5.73835	-0.92274
5	2	8	837351	-103343	8.37351	-1.03343
5	2	11	452260	-241238	4.5226	-2.41238
5	2	9	578501	-448981	5.78501	-4.48981
5	2	12	420197	-306734	4.20197	-3.06734
5	2	10	394349	-333678	3.94349	-3.33678
5	2	7	401252	-518314	4.01252	-5.18314
5	2	1	-48232	NaN	-0.48232	NaN
5	2	5	NaN	412263	NaN	4.12263
5	2	4	NaN	217570	NaN	2.1757
5	2	2	1049234	NaN	10.4923	NaN
5	2	6	NaN	49316	NaN	0.49316
5	2	3	1610604	NaN	16.106	NaN
5	2	4	NaN	-71468	NaN	-0.71468
5	2	3	153005	NaN	1.53005	NaN
5	2	6	NaN	-132335	NaN	-1.32335
5	2	1	355329	NaN	3.55329	NaN
5	2	5	NaN	-133752	NaN	-1.33752
5	2	2	457306	NaN	4.57306	NaN
5	2	2	649847	NaN	6.49847	NaN
5	2	1	177312	NaN	1.77312	NaN
5	2	3	450113	NaN	4.50113	NaN
5	2	6	NaN	-39433	NaN	-0.39433
5	2	4	NaN	-134803	NaN	-1.34803
5	2	5	NaN	-165994	NaN	-1.65994
5	2	4	NaN	-355654	NaN	-3.55654
5	2	2	366017	NaN	3.66017	NaN
5	2	1	441513	NaN	4.41513	NaN
5	2	6	NaN	-83754	NaN	-0.83754
5	2	5	NaN	-302745	NaN	-3.02745
5	2	3	550854	NaN	5.50854	NaN
5	2	2	449551	NaN	4.49551	NaN
5	2	4	NaN	-107113	NaN	-1.07113
5	2	5	NaN	28141	NaN	0.28141
5	2	1	193755	NaN	1.93755	NaN
5	2	6	NaN	85466	NaN	0.85466
5	2	3	415816	NaN	4.15816	NaN
5	2	5	NaN	-58562	NaN	-0.58562
5	2	4	NaN	-98579	NaN	-0.98579
5	2	6	NaN	-163441	NaN	-1.63441
5	2	1	143842	NaN	1.43842	NaN
5	2	2	284810	NaN	2.8481	NaN
5	2	3	323015	NaN	3.23015	NaN
5	2	5	NaN	-218776	NaN	-2.18776
5	2	4	NaN	-260087	NaN	-2.60087
5	2	3	475168	NaN	4.75168	NaN
5	2	1	360937	NaN	3.60937	NaN
5	2	6	NaN	-95909	NaN	-0.95909
5	2	2	252776	NaN	2.52776	NaN
5	2	2	389453	NaN	3.89453	NaN
5	2	3	599917	NaN	5.99917	NaN
5	2	6	NaN	-116465	NaN	-1.16465
5	2	5	NaN	-60547	NaN	-0.60547
5	2	4	NaN	-287006	NaN	-2.87006
5	2	1	335726	NaN	3.35726	NaN
5	2	3	520083	NaN	5.20083	NaN
5	2	2	646663	NaN	6.46663	NaN
5	2	5	NaN	-55851	NaN	-0.55851
5	2	6	NaN	-78922	NaN	-0.78922
5	2	4	NaN	-118645	NaN	-1.18645
5	2	1	465635	NaN	4.65635	NaN
5	2	5	NaN	-239165	NaN	-2.39165
5	2	3	592609	NaN	5.92609	NaN
5	2	6	NaN	-24697	NaN	-0.24697
5	2	2	393164	NaN	3.93164	NaN
5	2	4	NaN	-201404	NaN	-2.01404
5	2	1	192941	NaN	1.92941	NaN
5	2	1	353005	NaN	3.53005	NaN
5	2	3	294790	NaN	2.9479	NaN
5	2	4	NaN	-281194	NaN	-2.81194
5	2	5	NaN	-176347	NaN	-1.76347
5	2	6	NaN	43467	NaN	0.43467
5	2	2	366046	NaN	3.66046	NaN
5	2	3	556668	NaN	5.56668	NaN
5	2	1	225954	NaN	2.25954	NaN
5	2	4	NaN	-165629	NaN	-1.65629
5	2	2	737584	NaN	7.37584	NaN
5	2	6	NaN	-412813	NaN	-4.12813
5	2	5	NaN	-170547	NaN	-1.70547
5	2	6	NaN	-106781	NaN	-1.06781
5	2	5	NaN	-297260	NaN	-2.9726
5	2	4	NaN	-203599	NaN	-2.03599
5	2	2	360211	NaN	3.60211	NaN
5	2	1	502958	NaN	5.02958	NaN
5	2	3	591868	NaN	5.91868	NaN
5	2	5	NaN	-247614	NaN	-2.47614
5	2	1	590322	NaN	5.90322	NaN
5	2	3	269182	NaN	2.69182	NaN
5	2	2	683315	NaN	6.83315	NaN
5	2	6	NaN	-86434	NaN	-0.86434
5	2	4	NaN	-125128	NaN	-1.25128
5	2	3	653728	NaN	6.53728	NaN
5	2	5	NaN	-98695	NaN	-0.98695
5	2	1	306673	NaN	3.06673	NaN
5	2	6	NaN	-215615	NaN	-2.15615
5	2	2	423429	NaN	4.23429	NaN
5	2	4	NaN	-266876	NaN	-2.66876
5	2	10	644559	-290505	6.44559	-2.90505
5	2	8	733177	-309904	7.33177	-3.09904
5	2	12	621148	-326891	6.21148	-3.26891
5	2	7	725243	-301305	7.25243	-3.01305
5	2	11	664232	-382760	6.64232	-3.8276
5	2	9	705975	-502987	7.05975	-5.02987
5	2	7	532312	-651221	5.32312	-6.51221
5	2	9	785125	-485199	7.85125	-4.85199
5	2	11	727960	-343418	7.2796	-3.43418
5	2	12	580030	-370464	5.8003	-3.70464
5	2	10	383108	-503565	3.83108	-5.03565
5	2	8	723472	-316373	7.23472	-3.16373
5	2	12	868511	-90861	8.68511	-0.90861
5	2	10	415761	-450752	4.15761	-4.50752
5	2	11	720161	-208370	7.20161	-2.0837
5	2	7	661887	-425502	6.61887	-4.25502
5	2	8	701048	-243198	7.01048	-2.43198
5	2	9	1083588	-153514	10.8359	-1.53514
5	2	8	529460	-459099	5.2946	-4.59099
5	2	9	664454	-491060	6.64454	-4.9106
5	2	11	640082	-346287	6.40082	-3.46287
5	2	7	727222	-363894	7.27222	-3.63894
5	2	10	501371	-390935	5.01371	-3.90935
5	2	12	568393	-403984	5.68393	-4.03984
5	2	11	585827	-474680	5.85827	-4.7468
5	2	9	552019	-528400	5.52019	-5.284
5	2	8	804105	-299674	8.04105	-2.99674
5	2	7	732477	-434006	7.32477	-4.34006
5	2	12	826017	-119270	8.26017	-1.1927
5	2	10	658379	-340617	6.58379	-3.40617
6	1	11	655219	-158468	6.55219	-1.58468
6	1	8	870964	-160661	8.70964	-1.60661
6	1	12	592562	-214267	5.92562	-2.14267
6	1	9	799244	-200299	7.99244	-2.00299
6	1	7	720766	-223363	7.20766	-2.23363
6	1	10	866005	-26306	8.66005	-0.26306
6	1	11	771767	-42790	7.71767	-0.4279
6	1	8	815812	-152266	8.15812	-1.52266
6	1	9	697372	-262671	6.97372	-2.62671
6	1	7	838850	-129557	8.3885	-1.29557
6	1	12	539937	-202134	5.39937	-2.02134
6	1	10	594406	-220196	5.94406	-2.20196
6	1	10	468164	-315817	4.68164	-3.15817
6	1	12	623104	-198491	6.23104	-1.98491
6	1	8	832730	-232718	8.3273	-2.32718
6	1	7	651607	-326427	6.51607	-3.26427
6	1	11	649737	-105493	6.49737	-1.05493
6	1	9	763442	-268117	7.63442	-2.68117
6	1	9	851584	-241046	8.51584	-2.41046
6	1	12	617828	-210966	6.17828	-2.10966
6	1	10	628370	-242152	6.2837	-2.42152
6	1	8	797761	-240537	7.97761	-2.40537
6	1	7	736454	-329712	7.36454	-3.29712
6	1	11	574860	-207055	5.7486	-2.07055
6	1	8	749401	-262791	7.49401	-2.62791
6	1	7	825672	-211382	8.25672	-2.11382
6	1	10	777480	-132388	7.7748	-1.32388
6	1	9	870325	-161782	8.70325	-1.61782
6	1	12	525704	-251808	5.25704	-2.51808
6	1	11	576614	-258196	5.76614	-2.58196
6	1	2	1412815	NaN	14.1281	NaN
6	1	5	NaN	-794648	NaN	-7.94648
6	1	1	1263280	NaN	12.6328	NaN
6	1	3	1375333	NaN	13.7533	NaN
6	1	6	NaN	-893089	NaN	-8.93089
6	1	4	NaN	-680173	NaN	-6.80173
6	1	3	1375472	NaN	13.7547	NaN
6	1	4	NaN	-529249	NaN	-5.29249
6	1	5	NaN	-490022	NaN	-4.90022
6	1	6	NaN	-604965	NaN	-6.04965
6	1	2	873875	NaN	8.73875	NaN
6	1	1	827536	NaN	8.27536	NaN
6	1	4	NaN	-620646	NaN	-6.20646
6	1	6	NaN	-437939	NaN	-4.37939
6	1	5	NaN	-420671	NaN	-4.20671
6	1	3	1364382	NaN	13.6438	NaN
6	1	2	1085216	NaN	10.8522	NaN
6	1	1	930390	NaN	9.3039	NaN
6	1	3	1110352	NaN	11.1035	NaN
6	1	5	NaN	-543349	NaN	-5.43349
6	1	4	NaN	-519830	NaN	-5.1983
6	1	1	1104330	NaN	11.0433	NaN
6	1	2	1133216	NaN	11.3322	NaN
6	1	6	NaN	-378217	NaN	-3.78217
6	1	5	NaN	-417637	NaN	-4.17637
6	1	4	NaN	-336092	NaN	-3.36092
6	1	1	1127433	NaN	11.2743	NaN
6	1	6	NaN	-319968	NaN	-3.19968
6	1	3	1292402	NaN	12.924	NaN
6	1	2	1094564	NaN	10.9456	NaN
6	1	2	1081198	NaN	10.812	NaN
6	1	3	1315302	NaN	13.153	NaN
6	1	1	877107	NaN	8.77107	NaN
6	1	4	NaN	-495177	NaN	-4.95177
6	1	5	NaN	-342521	NaN	-3.42521
6	1	6	NaN	-393289	NaN	-3.93289
6	1	1	1293987	NaN	12.9399	NaN
6	1	3	1240061	NaN	12.4006	NaN
6	1	4	NaN	-585653	NaN	-5.85653
6	1	5	NaN	-361352	NaN	-3.61352
6	1	6	NaN	-232564	NaN	-2.32564
6	1	2	1264932	NaN	12.6493	NaN
6	1	4	NaN	-465224	NaN	-4.65224
6	1	1	1132293	NaN	11.3229	NaN
6	1	6	NaN	-446317	NaN	-4.46317
6	1	5	NaN	-240399	NaN	-2.40399
6	1	3	1119454	NaN	11.1945	NaN
6	1	2	1122873	NaN	11.2287	NaN
6	1	3	1266447	NaN	12.6645	NaN
6	1	4	NaN	-497487	NaN	-4.97487
6	1	1	808915	NaN	8.08915	NaN
6	1	5	NaN	-426814	NaN	-4.26814
6	1	6	NaN	-404319	NaN	-4.04319
6	1	2	914564	NaN	9.14564	NaN
6	1	2	685025	NaN	6.85025	NaN
6	1	6	NaN	-691039	NaN	-6.91039
6	1	1	662670	NaN	6.6267	NaN
6	1	5	NaN	-369702	NaN	-3.69702
6	1	3	899469	NaN	8.99469	NaN
6	1	4	NaN	-291335	NaN	-2.91335
6	1	3	1011656	NaN	10.1166	NaN
6	1	2	1011930	NaN	10.1193	NaN
6	1	1	690808	NaN	6.90808	NaN
6	1	4	NaN	-409960	NaN	-4.0996
6	1	5	NaN	-357770	NaN	-3.5777
6	1	6	NaN	-611407	NaN	-6.11407
6	1	3	957066	NaN	9.57066	NaN
6	1	1	763755	NaN	7.63755	NaN
6	1	4	NaN	-381604	NaN	-3.81604
6	1	6	NaN	-220292	NaN	-2.20292
6	1	5	NaN	-408250	NaN	-4.0825
6	1	2	1174926	NaN	11.7493	NaN
6	1	5	NaN	-366286	NaN	-3.66286
6	1	3	1022982	NaN	10.2298	NaN
6	1	6	NaN	-225218	NaN	-2.25218
6	1	4	NaN	-379555	NaN	-3.79555
6	1	2	863568	NaN	8.63568	NaN
6	1	1	989529	NaN	9.89529	NaN
6	1	3	1067313	NaN	10.6731	NaN
6	1	4	NaN	-317956	NaN	-3.17956
6	1	5	NaN	-513584	NaN	-5.13584
6	1	6	NaN	-402108	NaN	-4.02108
6	1	1	1017132	NaN	10.1713	NaN
6	1	2	1234821	NaN	12.3482	NaN
6	1	2	1280790	NaN	12.8079	NaN
6	1	6	NaN	-314174	NaN	-3.14174
6	1	3	1170511	NaN	11.7051	NaN
6	1	4	NaN	-567217	NaN	-5.67217
6	1	1	945478	NaN	9.45478	NaN
6	1	5	NaN	-351968	NaN	-3.51968
6	1	8	942772	45899	9.42772	0.45899
6	1	10	610248	-121457	6.10248	-1.21457
6	1	7	920722	-46022	9.20722	-0.46022
6	1	12	584549	-210458	5.84549	-2.10458
6	1	9	743373	-222502	7.43373	-2.22502
6	1	11	536892	-258925	5.36892	-2.58925
6	1	11	640510	-213473	6.4051	-2.13473
6	1	10	569118	-242805	5.69118	-2.42805
6	1	9	823021	-217993	8.23021	-2.17993
6	1	8	865830	-131555	8.6583	-1.31555
6	1	7	739569	-305560	7.39569	-3.0556
6	1	12	586894	-239037	5.86894	-2.39037
6	1	10	642103	-186476	6.42103	-1.86476
6	1	11	713136	-115598	7.13136	-1.15598
6	1	7	779915	-171984	7.79915	-1.71984
6	1	9	663302	-275686	6.63302	-2.75686
6	1	12	568935	-276710	5.68935	-2.7671
6	1	8	692646	-389426	6.92646	-3.89426
6	1	11	631361	-147009	6.31361	-1.47009
6	1	8	847734	-218439	8.47734	-2.18439
6	1	9	767715	-305562	7.67715	-3.05562
6	1	7	643568	-425631	6.43568	-4.25631
6	1	10	560906	-255748	5.60906	-2.55748
6	1	12	752497	-72074	7.52497	-0.72074
6	1	9	936325	-114300	9.36325	-1.143
6	1	8	818539	-239270	8.18539	-2.3927
6	1	7	897408	-119696	8.97408	-1.19696
6	1	10	745399	-159882	7.45399	-1.59882
6	1	11	800531	-108928	8.00531	-1.08928
6	1	12	793569	-83915	7.93569	-0.83915
6	2	12	725865	-155063	7.25865	-1.55063
6	2	8	943037	-235502	9.43037	-2.35502
6	2	9	820847	-360830	8.20847	-3.6083
6	2	7	863694	-262048	8.63694	-2.62048
6	2	11	553599	-444256	5.53599	-4.44256
6	2	10	717009	-244116	7.17009	-2.44116
6	2	7	776964	-429032	7.76964	-4.29032
6	2	8	721734	-472648	7.21734	-4.72648
6	2	9	752538	-401284	7.52538	-4.01284
6	2	10	641346	-286718	6.41346	-2.86718
6	2	12	677615	-282978	6.77615	-2.82978
6	2	11	598425	-331561	5.98425	-3.31561
6	2	7	892648	-244814	8.92648	-2.44814
6	2	9	980676	-103613	9.80676	-1.03613
6	2	12	745144	-147032	7.45144	-1.47032
6	2	11	584009	-349106	5.84009	-3.49106
6	2	10	845023	-128274	8.45023	-1.28274
6	2	8	740438	-381029	7.40438	-3.81029
6	2	9	780469	-236317	7.80469	-2.36317
6	2	7	935929	-204284	9.35929	-2.04284
6	2	10	533680	-297581	5.3368	-2.97581
6	2	12	618114	-150422	6.18114	-1.50422
6	2	8	811704	-325482	8.11704	-3.25482
6	2	11	735154	-162415	7.35154	-1.62415
6	2	7	854800	-261590	8.548	-2.6159
6	2	9	855761	-297952	8.55761	-2.97952
6	2	10	732379	-173112	7.32379	-1.73112
6	2	11	741716	-136535	7.41716	-1.36535
6	2	12	705001	-223556	7.05001	-2.23556
6	2	8	958015	-144911	9.58015	-1.44911
6	2	6	NaN	350418	NaN	3.50418
6	2	5	NaN	77326	NaN	0.77326
6	2	4	NaN	-257486	NaN	-2.57486
6	2	2	864402	NaN	8.64402	NaN
6	2	3	1313277	NaN	13.1328	NaN
6	2	1	445253	NaN	4.45253	NaN
6	2	5	NaN	-111727	NaN	-1.11727
6	2	1	425999	NaN	4.25999	NaN
6	2	3	879025	NaN	8.79025	NaN
6	2	4	NaN	-57281	NaN	-0.57281
6	2	2	496894	NaN	4.96894	NaN
6	2	6	NaN	-55558	NaN	-0.55558
6	2	2	707114	NaN	7.07114	NaN
6	2	3	665048	NaN	6.65048	NaN
6	2	1	293106	NaN	2.93106	NaN
6	2	4	NaN	42558	NaN	0.42558
6	2	5	NaN	-80241	NaN	-0.80241
6	2	6	NaN	-36020	NaN	-0.3602
6	2	2	604315	NaN	6.04315	NaN
6	2	4	NaN	-202576	NaN	-2.02576
6	2	3	714201	NaN	7.14201	NaN
6	2	1	548332	NaN	5.48332	NaN
6	2	5	NaN	-34516	NaN	-0.34516
6	2	6	NaN	138856	NaN	1.38856
6	2	4	NaN	-401096	NaN	-4.01096
6	2	2	697675	NaN	6.97675	NaN
6	2	1	755933	NaN	7.55933	NaN
6	2	5	NaN	-91095	NaN	-0.91095
6	2	3	704910	NaN	7.0491	NaN
6	2	6	NaN	-218225	NaN	-2.18225
6	2	3	678069	NaN	6.78069	NaN
6	2	1	586915	NaN	5.86915	NaN
6	2	6	NaN	-145469	NaN	-1.45469
6	2	4	NaN	-104642	NaN	-1.04642
6	2	5	NaN	-183141	NaN	-1.83141
6	2	2	855887	NaN	8.55887	NaN
6	2	5	NaN	-161191	NaN	-1.61191
6	2	1	682665	NaN	6.82665	NaN
6	2	2	807821	NaN	8.07821	NaN
6	2	4	NaN	-331101	NaN	-3.31101
6	2	6	NaN	-62827	NaN	-0.62827
6	2	3	986908	NaN	9.86908	NaN
6	2	4	NaN	-277143	NaN	-2.77143
6	2	6	NaN	-21777	NaN	-0.21777
6	2	1	759173	NaN	7.59173	NaN
6	2	3	1109821	NaN	11.0982	NaN
6	2	5	NaN	-206612	NaN	-2.06612
6	2	2	688363	NaN	6.88363	NaN
6	2	3	680328	NaN	6.80328	NaN
6	2	6	NaN	-96123	NaN	-0.96123
6	2	5	NaN	-194415	NaN	-1.94415
6	2	4	NaN	-339870	NaN	-3.3987
6	2	2	440532	NaN	4.40532	NaN
6	2	1	406705	NaN	4.06705	NaN
6	2	6	NaN	-174718	NaN	-1.74718
6	2	4	NaN	-242920	NaN	-2.4292
6	2	5	NaN	-39975	NaN	-0.39975
6	2	3	626295	NaN	6.26295	NaN
6	2	2	581545	NaN	5.81545	NaN
6	2	1	668269	NaN	6.68269	NaN
6	2	5	NaN	-166436	NaN	-1.66436
6	2	6	NaN	-547141	NaN	-5.47141
6	2	1	538624	NaN	5.38624	NaN
6	2	4	NaN	-255825	NaN	-2.55825
6	2	3	781428	NaN	7.81428	NaN
6	2	2	506983	NaN	5.06983	NaN
6	2	5	NaN	-216413	NaN	-2.16413
6	2	1	567259	NaN	5.67259	NaN
6	2	6	NaN	163256	NaN	1.63256
6	2	2	933557	NaN	9.33557	NaN
6	2	4	NaN	-170712	NaN	-1.70712
6	2	3	1071391	NaN	10.7139	NaN
6	2	4	NaN	-294045	NaN	-2.94045
6	2	3	987614	NaN	9.87614	NaN
6	2	2	862638	NaN	8.62638	NaN
6	2	5	NaN	44776	NaN	0.44776
6	2	1	649482	NaN	6.49482	NaN
6	2	6	NaN	24911	NaN	0.24911
6	2	5	NaN	63647	NaN	0.63647
6	2	2	849658	NaN	8.49658	NaN
6	2	3	916251	NaN	9.16251	NaN
6	2	4	NaN	-215301	NaN	-2.15301
6	2	6	NaN	-90941	NaN	-0.90941
6	2	1	525610	NaN	5.2561	NaN
6	2	1	551030	NaN	5.5103	NaN
6	2	6	NaN	-99023	NaN	-0.99023
6	2	3	817445	NaN	8.17445	NaN
6	2	4	NaN	-155134	NaN	-1.55134
6	2	2	850718	NaN	8.50718	NaN
6	2	5	NaN	-42698	NaN	-0.42698
6	2	8	928849	-44582	9.28849	-0.44582
6	2	11	823115	-72639	8.23115	-0.72639
6	2	7	668724	-451817	6.68724	-4.51817
6	2	12	740974	-180671	7.40974	-1.80671
6	2	9	814727	-154880	8.14727	-1.5488
6	2	10	822296	-116279	8.22296	-1.16279
6	2	10	695837	-214745	6.95837	-2.14745
6	2	9	990472	-100387	9.90472	-1.00387
6	2	7	925967	-178250	9.25967	-1.7825
6	2	12	757357	-20439	7.57357	-0.20439
6	2	11	797478	-53616	7.97478	-0.53616
6	2	8	1013317	-14900	10.1332	-0.149
6	2	9	878862	-153620	8.78862	-1.5362
6	2	10	708788	-217333	7.08788	-2.17333
6	2	8	869438	-136930	8.69438	-1.3693
6	2	11	663473	-213533	6.63473	-2.13533
6	2	12	692919	-211541	6.92919	-2.11541
6	2	7	785173	-189665	7.85173	-1.89665
6	2	12	639739	-247097	6.39739	-2.47097
6	2	7	838551	-155451	8.38551	-1.55451
6	2	11	755590	-109328	7.5559	-1.09328
6	2	9	865577	-60301	8.65577	-0.60301
6	2	10	627282	-233608	6.27282	-2.33608
6	2	8	781005	-273049	7.81005	-2.73049
6	2	11	646243	-184840	6.46243	-1.8484
6	2	12	699737	-82182	6.99737	-0.82182
6	2	7	835258	-98624	8.35258	-0.98624
6	2	10	807558	-13726	8.07558	-0.13726
6	2	9	886664	-82216	8.86664	-0.82216
6	2	8	777740	-185012	7.7774	-1.85012
7	1	11	561444	-217525	5.61444	-2.17525
7	1	7	872857	-367718	8.72857	-3.67718
7	1	9	1016358	-201715	10.1636	-2.01715
7	1	12	719735	-188267	7.19735	-1.88267
7	1	10	556313	-469941	5.56313	-4.69941
7	1	8	692822	-461140	6.92822	-4.6114
7	1	11	433779	-443664	4.33779	-4.43664
7	1	9	833903	-213300	8.33903	-2.133
7	1	12	527614	-215629	5.27614	-2.15629
7	1	10	534715	-395047	5.34715	-3.95047
7	1	8	724205	-449649	7.24205	-4.49649
7	1	7	872234	-359916	8.72234	-3.59916
7	1	11	697172	-106734	6.97172	-1.06734
7	1	7	575828	-403878	5.75828	-4.03878
7	1	12	576773	-329439	5.76773	-3.29439
7	1	10	577982	-380917	5.77982	-3.80917
7	1	8	673681	-553172	6.73681	-5.53172
7	1	9	668424	-545701	6.68424	-5.45701
7	1	10	302686	-450467	3.02686	-4.50467
7	1	8	456283	-545065	4.56283	-5.45065
7	1	9	743161	-285846	7.43161	-2.85846
7	1	12	301586	-508364	3.01586	-5.08364
7	1	11	408909	-431982	4.08909	-4.31982
7	1	7	895433	-305592	8.95433	-3.05592
7	1	10	722182	-318295	7.22182	-3.18295
7	1	9	779908	-448017	7.79908	-4.48017
7	1	7	783496	-430673	7.83496	-4.30673
7	1	8	664513	-479559	6.64513	-4.79559
7	1	12	227924	-496876	2.27924	-4.96876
7	1	11	226885	-466753	2.26885	-4.66753
7	1	5	NaN	-956716	NaN	-9.56716
7	1	3	1383513	NaN	13.8351	NaN
7	1	4	NaN	-915829	NaN	-9.15829
7	1	6	NaN	-772144	NaN	-7.72144
7	1	1	1211465	NaN	12.1146	NaN
7	1	2	1562898	NaN	15.629	NaN
7	1	3	1481135	NaN	14.8113	NaN
7	1	1	1103085	NaN	11.0308	NaN
7	1	5	NaN	-1117534	NaN	-11.1753
7	1	6	NaN	-195290	NaN	-1.9529
7	1	4	NaN	-577536	NaN	-5.77536
7	1	2	1469849	NaN	14.6985	NaN
7	1	1	1121079	NaN	11.2108	NaN
7	1	6	NaN	-642931	NaN	-6.42931
7	1	4	NaN	-772898	NaN	-7.72898
7	1	5	NaN	-406620	NaN	-4.0662
7	1	3	1349875	NaN	13.4987	NaN
7	1	2	1273927	NaN	12.7393	NaN
7	1	5	NaN	-357887	NaN	-3.57887
7	1	3	1210740	NaN	12.1074	NaN
7	1	4	NaN	-409762	NaN	-4.09762
7	1	6	NaN	-411717	NaN	-4.11717
7	1	1	1205861	NaN	12.0586	NaN
7	1	2	1350520	NaN	13.5052	NaN
7	1	4	NaN	-585155	NaN	-5.85155
7	1	2	1344134	NaN	13.4413	NaN
7	1	6	NaN	-692850	NaN	-6.9285
7	1	1	1159123	NaN	11.5912	NaN
7	1	5	NaN	-497261	NaN	-4.97261
7	1	3	1310254	NaN	13.1025	NaN
7	1	6	NaN	-736441	NaN	-7.36441
7	1	1	1032265	NaN	10.3226	NaN
7	1	2	1357065	NaN	13.5707	NaN
7	1	4	NaN	-724391	NaN	-7.24391
7	1	3	1334093	NaN	13.3409	NaN
7	1	5	NaN	-650520	NaN	-6.5052
7	1	4	NaN	-335709	NaN	-3.35709
7	1	1	1096212	NaN	10.9621	NaN
7	1	3	1202605	NaN	12.026	NaN
7	1	2	1106815	NaN	11.0681	NaN
7	1	5	NaN	-477887	NaN	-4.77887
7	1	6	NaN	-363109	NaN	-3.63109
7	1	4	NaN	-596924	NaN	-5.96924
7	1	3	1551213	NaN	15.5121	NaN
7	1	2	1297776	NaN	12.9778	NaN
7	1	6	NaN	-506984	NaN	-5.06984
7	1	5	NaN	-584005	NaN	-5.84005
7	1	1	1284518	NaN	12.8452	NaN
7	1	3	1222563	NaN	12.2256	NaN
7	1	6	NaN	-605080	NaN	-6.0508
7	1	4	NaN	-625615	NaN	-6.25615
7	1	2	1131817	NaN	11.3182	NaN
7	1	1	762576	NaN	7.62576	NaN
7	1	5	NaN	-433727	NaN	-4.33727
7	1	4	NaN	-692078	NaN	-6.92078
7	1	1	1342601	NaN	13.426	NaN
7	1	5	NaN	-434937	NaN	-4.34937
7	1	2	1131021	NaN	11.3102	NaN
7	1	6	NaN	-537584	NaN	-5.37584
7	1	3	1384764	NaN	13.8476	NaN
7	1	3	1365583	NaN	13.6558	NaN
7	1	2	1087536	NaN	10.8754	NaN
7	1	1	982366	NaN	9.82366	NaN
7	1	5	NaN	-522972	NaN	-5.22972
7	1	6	NaN	-499734	NaN	-4.99734
7	1	4	NaN	-681619	NaN	-6.81619
7	1	3	1334902	NaN	13.349	NaN
7	1	4	NaN	-573006	NaN	-5.73006
7	1	1	1146756	NaN	11.4676	NaN
7	1	6	NaN	-383949	NaN	-3.83949
7	1	5	NaN	-360632	NaN	-3.60632
7	1	2	1317365	NaN	13.1737	NaN
7	1	5	NaN	-436653	NaN	-4.36653
7	1	2	1055525	NaN	10.5552	NaN
7	1	4	NaN	-440242	NaN	-4.40242
7	1	6	NaN	-414068	NaN	-4.14068
7	1	3	1030215	NaN	10.3021	NaN
7	1	1	1074673	NaN	10.7467	NaN
7	1	5	NaN	-450985	NaN	-4.50985
7	1	2	1228712	NaN	12.2871	NaN
7	1	1	1226338	NaN	12.2634	NaN
7	1	4	NaN	-517876	NaN	-5.17876
7	1	6	NaN	-641818	NaN	-6.41818
7	1	3	998910	NaN	9.9891	NaN
7	1	3	977969	NaN	9.77969	NaN
7	1	6	NaN	-652878	NaN	-6.52878
7	1	1	1121517	NaN	11.2152	NaN
7	1	4	NaN	-270259	NaN	-2.70259
7	1	2	1206779	NaN	12.0678	NaN
7	1	5	NaN	-676901	NaN	-6.76901
7	1	11	511756	-365961	5.11756	-3.65961
7	1	8	598352	-486095	5.98352	-4.86095
7	1	10	532602	-291988	5.32602	-2.91988
7	1	7	702666	-268756	7.02666	-2.68756
7	1	12	583183	-351158	5.83183	-3.51158
7	1	9	727869	-467722	7.27869	-4.67722
7	1	12	543968	-400281	5.43968	-4.00281
7	1	9	623572	-411387	6.23572	-4.11387
7	1	7	581589	-330590	5.81589	-3.3059
7	1	10	445888	-501946	4.45888	-5.01946
7	1	11	528172	-234439	5.28172	-2.34439
7	1	8	815937	-277069	8.15937	-2.77069
7	1	10	586389	-320990	5.86389	-3.2099
7	1	12	337439	-589215	3.37439	-5.89215
7	1	9	782652	-431962	7.82652	-4.31962
7	1	7	552622	-524457	5.52622	-5.24457
7	1	11	657001	-180746	6.57001	-1.80746
7	1	8	625719	-515881	6.25719	-5.15881
7	1	11	388024	-427480	3.88024	-4.2748
7	1	8	795587	-282119	7.95587	-2.82119
7	1	9	759156	-313275	7.59156	-3.13275
7	1	10	550805	-424171	5.50805	-4.24171
7	1	7	614306	-403633	6.14306	-4.03633
7	1	12	420617	-409380	4.20617	-4.0938
7	1	7	750587	-443333	7.50587	-4.43333
7	1	9	NaN	NaN	NaN	NaN
7	1	8	691766	-371831	6.91766	-3.71831
7	1	10	396514	-447955	3.96514	-4.47955
7	1	11	689671	-216796	6.89671	-2.16796
7	1	12	636853	-175656	6.36853	-1.75656
7	2	11	571436	-310197	5.71436	-3.10197
7	2	8	810010	-326594	8.1001	-3.26594
7	2	9	603597	-484297	6.03597	-4.84297
7	2	12	403769	-384139	4.03769	-3.84139
7	2	7	611701	-508014	6.11701	-5.08014
7	2	10	558080	-260578	5.5808	-2.60578
7	2	7	601223	-480285	6.01223	-4.80285
7	2	11	694731	-94899	6.94731	-0.94899
7	2	10	644882	-274946	6.44882	-2.74946
7	2	9	572422	-588263	5.72422	-5.88263
7	2	8	NaN	-449649	NaN	-4.49649
7	2	12	601122	-298032	6.01122	-2.98032
7	2	10	568037	-334195	5.68037	-3.34195
7	2	8	772403	-289578	7.72403	-2.89578
7	2	12	241315	-730569	2.41315	-7.30569
7	2	11	603023	-378146	6.03023	-3.78146
7	2	7	718323	-525024	7.18323	-5.25024
7	2	9	745931	-299807	7.45931	-2.99807
7	2	8	703420	-517706	7.0342	-5.17706
7	2	7	936231	-271404	9.36231	-2.71404
7	2	11	486561	-476433	4.86561	-4.76433
7	2	10	539662	-407067	5.39662	-4.07067
7	2	12	539073	-473852	5.39073	-4.73852
7	2	9	793836	-395688	7.93836	-3.95688
7	2	9	629342	-642691	6.29342	-6.42691
7	2	12	569818	-397983	5.69818	-3.97983
7	2	10	562972	-352383	5.62972	-3.52383
7	2	8	648993	-537379	6.48993	-5.37379
7	2	11	457676	-587551	4.57676	-5.87551
7	2	7	771550	-411568	7.7155	-4.11568
7	2	3	1599543	NaN	15.9954	NaN
7	2	1	140359	NaN	1.40359	NaN
7	2	6	NaN	241521	NaN	2.41521
7	2	2	475763	NaN	4.75763	NaN
7	2	4	NaN	209966	NaN	2.09966
7	2	5	NaN	-56817	NaN	-0.56817
7	2	2	501840	NaN	5.0184	NaN
7	2	1	287915	NaN	2.87915	NaN
7	2	5	NaN	119881	NaN	1.19881
7	2	4	NaN	-180917	NaN	-1.80917
7	2	3	289588	NaN	2.89588	NaN
7	2	6	NaN	-254731	NaN	-2.54731
7	2	5	NaN	-226891	NaN	-2.26891
7	2	1	98642	NaN	0.98642	NaN
7	2	6	NaN	-127558	NaN	-1.27558
7	2	4	NaN	-466701	NaN	-4.66701
7	2	2	246583	NaN	2.46583	NaN
7	2	3	240256	NaN	2.40256	NaN
7	2	5	NaN	-100541	NaN	-1.00541
7	2	2	304274	NaN	3.04274	NaN
[truncated: 400 more rows]

## Sheet: Coding Data fig1
Col
1	Participant
2	Adaptation
3	Stimulus
4	Index finger re target
5	Thumb re target
Adaptation	1	Aperture decreases
	2	Aperture increases
Stim	1	Index finger	position 1	1,2,3 staat voor de verschillende plekken van het blokje. Alle data is uitgedrukt als afwijking van dit blokje dus je kunt ze samennemen.
	2	Index finger	position 2
	3	Index finger	position 3
	4	Thumb	position 1
	5	Thumb	position 2
	6	Thumb	position 3
	7	Grasp large	position 1
	8	Grasp large	position 2
	9	Grasp large	position 3
	10	Grasp small	position 1
	11	Grasp small	position 2
	12	Grasp small	position 3

## Sheet: Data_fig_1B,C_centre
aperture_small_TL_pre	aperture_small_TL_post	aperture_large_TL_pre	aperture_large_TL_post	aperture_small_TR_pre	aperture_small_TR_post	aperture_large_TR_pre	aperture_large_TR_post	position_small_TL_pre	position_small_TL_post	position_large_TL_pre	position_large_TL_post	position_small_TR_pre	position_small_TR_post	position_large_TR_pre	position_large_TR_post
95.6194	77.701	115.797	102.766	89.2111	93.4662	113.472	118.904	14.1629	8.7323	14.9129	12.5445	0.8221	10.3714	15.5266	24.6144
89.6516	84.6036	109.085	110.141	86.2721	96.6253	105.897	113.681	4.7589	16.6899	13.1403	23.8557	7.2239	18.6209	11.5443	17.3696
78.8091	72.8411	103.126	91.3758	82.5169	88.5752	107.448	110.309	13.9576	14.3471	12.9331	14.2754	11.5683	1.5007	7.9103	0.941
109.273	75.9028	134.187	106.876	104.174	104.409	128.008	130.398	14.2989	3.2709	12.757	6.0227	-1.5818	4.3902	8.5331	5.0348
85.2561	81.1653	103.069	101.776	72.9672	95.0494	98.7369	109.112	11.5211	25.2349	11.8939	19.2894	6.3933	14.6898	6.476	14.9963
81.4557	82.5932	103.156	104.101	92.8064	87.7005	113.746	99.4001	19.3109	22.7814	29.9472	30.2514	23.6446	28.0151	27.8905	36.6254
84.0891	87.7717	120.103	107.739	91.9828	94.4359	117.19	115.112	6.9834	7.2897	16.5945	14.185	10.5295	2.5672	9.4753	9.19
86.6981	80.0248	115.381	106.954	88.6668	91.1218	122.475	119.27	-4.145	11.6915	-1.8099	3.5893	12.3141	17.0979	5.4769	11.5857
